# Supplementary material for: Analysis of structural diversity in wolf-like canids reveals post-domestication variants
Source: PubMed Central journal article supplement (PMC4070573; doi:10.1186/1471-2164-15-465), 2014-06-12

**Table S1. List of 1611 CNVs regions analyzed.** Location in the canine genome (in CanFam2) and the reference where the region was identified as CNV.

| <b>Id</b> | <b>Location</b>          | <b>Nicholas et al 2009</b> | <b>Nicholas et al 2011</b> | <b>Chen et al 2009</b> | <b>Nicholas et al 2011b*</b> | <b>Control</b> |
|-----------|--------------------------|----------------------------|----------------------------|------------------------|------------------------------|----------------|
| 1         | chr1:7659258-7685115     | 1                          | 0                          | 0                      | 1                            | 0              |
| 2         | chr1:15383000-15433000   | 0                          | 0                          | 0                      | 1                            | 1              |
| 3         | chr1:15622923-15641362   | 0                          | 0                          | 0                      | 1                            | 0              |
| 4         | chr1:17028737-17049272   | 0                          | 0                          | 0                      | 1                            | 0              |
| 5         | chr1:19280766-19389071   | 0                          | 0                          | 1                      | 0                            | 0              |
| 6         | chr1:26658693-26672654   | 0                          | 0                          | 0                      | 1                            | 0              |
| 7         | chr1:27081367-27101856   | 0                          | 0                          | 0                      | 1                            | 0              |
| 8         | chr1:27689981-27728640   | 0                          | 1                          | 0                      | 1                            | 0              |
| 9         | chr1:28637185-28651382   | 0                          | 0                          | 0                      | 1                            | 0              |
| 10        | chr1:28741708-28774713   | 0                          | 1                          | 0                      | 1                            | 0              |
| 11        | chr1:30845204-30861811   | 0                          | 0                          | 0                      | 1                            | 0              |
| 12        | chr1:32761783-32800255   | 0                          | 1                          | 0                      | 1                            | 0              |
| 13        | chr1:33574200-33590460   | 0                          | 0                          | 0                      | 1                            | 0              |
| 14        | chr1:43628850-43673566   | 0                          | 1                          | 0                      | 1                            | 0              |
| 15        | chr1:44540004-44555203   | 0                          | 0                          | 0                      | 1                            | 0              |
| 16        | chr1:46735977-46756513   | 0                          | 0                          | 0                      | 1                            | 0              |
| 17        | chr1:53314209-53332483   | 0                          | 0                          | 0                      | 1                            | 0              |
| 18        | chr1:58374583-58388605   | 0                          | 0                          | 0                      | 1                            | 0              |
| 19        | chr1:59729895-59744110   | 0                          | 0                          | 0                      | 1                            | 0              |
| 20        | chr1:59932647-59950197   | 0                          | 0                          | 0                      | 1                            | 0              |
| 21        | chr1:59957851-59977386   | 0                          | 0                          | 0                      | 1                            | 0              |
| 22        | chr1:60496517-60512605   | 0                          | 0                          | 0                      | 1                            | 0              |
| 23        | chr1:61731954-61751501   | 0                          | 0                          | 0                      | 1                            | 0              |
| 24        | chr1:62878468-62901251   | 0                          | 0                          | 0                      | 1                            | 0              |
| 25        | chr1:64182758-64197008   | 0                          | 0                          | 0                      | 1                            | 0              |
| 26        | chr1:66101746-66118074   | 0                          | 0                          | 0                      | 1                            | 0              |
| 27        | chr1:66799863-66856988   | 0                          | 1                          | 0                      | 1                            | 0              |
| 28        | chr1:68993035-69013347   | 0                          | 0                          | 0                      | 1                            | 0              |
| 29        | chr1:69337580-69355902   | 0                          | 0                          | 0                      | 1                            | 0              |
| 30        | chr1:71791767-71815413   | 0                          | 0                          | 0                      | 1                            | 0              |
| 31        | chr1:72605352-72629541   | 1                          | 0                          | 0                      | 0                            | 0              |
| 32        | chr1:75143671-75165349   | 0                          | 0                          | 0                      | 1                            | 0              |
| 33        | chr1:75721894-75743567   | 0                          | 0                          | 0                      | 1                            | 0              |
| 34        | chr1:77236298-77256256   | 0                          | 0                          | 0                      | 1                            | 0              |
| 35        | chr1:78056944-78176123   | 1                          | 0                          | 0                      | 1                            | 0              |
| 36        | chr1:78214715-78251568   | 1                          | 0                          | 0                      | 0                            | 0              |
| 37        | chr1:78266301-78283886   | 0                          | 0                          | 0                      | 1                            | 0              |
| 38        | chr1:80539028-80556301   | 0                          | 0                          | 0                      | 1                            | 0              |
| 39        | chr1:82564821-82580119   | 0                          | 0                          | 0                      | 1                            | 0              |
| 40        | chr1:84602417-84619744   | 0                          | 0                          | 0                      | 1                            | 0              |
| 41        | chr1:87468936-87483131   | 0                          | 0                          | 0                      | 1                            | 0              |
| 42        | chr1:91402045-91420264   | 0                          | 0                          | 0                      | 1                            | 0              |
| 43        | chr1:94251848-94268251   | 0                          | 0                          | 0                      | 1                            | 0              |
| 44        | chr1:95904579-95918782   | 0                          | 0                          | 0                      | 1                            | 0              |
| 45        | chr1:97837108-97862211   | 0                          | 0                          | 0                      | 1                            | 0              |
| 46        | chr1:99031985-99064045   | 0                          | 0                          | 0                      | 1                            | 0              |
| 47        | chr1:100206591-100224997 | 0                          | 0                          | 0                      | 1                            | 0              |
| 48        | chr1:104590912-104613831 | 0                          | 1                          | 0                      | 1                            | 0              |
| 49        | chr1:104811883-104828323 | 0                          | 0                          | 0                      | 1                            | 0              |

|     |                          |   |   |   |   |   |
|-----|--------------------------|---|---|---|---|---|
| 50  | chr1:104914544-105079782 | 0 | 1 | 0 | 0 | 0 |
| 51  | chr1:105196217-105226299 | 0 | 0 | 0 | 1 | 0 |
| 52  | chr1:105636540-105667700 | 0 | 0 | 0 | 1 | 0 |
| 53  | chr1:105731316-105751532 | 0 | 0 | 0 | 1 | 0 |
| 54  | chr1:105809893-105848142 | 0 | 1 | 0 | 1 | 0 |
| 55  | chr1:105928012-105942317 | 0 | 0 | 0 | 1 | 0 |
| 56  | chr1:106071301-106093839 | 0 | 0 | 0 | 1 | 0 |
| 57  | chr1:106151996-106173446 | 0 | 0 | 0 | 1 | 0 |
| 58  | chr1:106217333-106231354 | 0 | 0 | 0 | 1 | 0 |
| 59  | chr1:106975904-107149173 | 1 | 0 | 0 | 0 | 0 |
| 60  | chr1:107159760-107442965 | 1 | 1 | 0 | 1 | 0 |
| 61  | chr1:107459055-107477741 | 0 | 0 | 0 | 1 | 0 |
| 62  | chr1:107558390-107589442 | 0 | 1 | 0 | 1 | 0 |
| 63  | chr1:107719005-107733181 | 0 | 0 | 0 | 1 | 0 |
| 64  | chr1:108107502-108126036 | 1 | 0 | 0 | 0 | 0 |
| 65  | chr1:108154205-108172475 | 1 | 0 | 0 | 0 | 0 |
| 66  | chr1:108881250-108919537 | 1 | 0 | 0 | 1 | 0 |
| 67  | chr1:109797183-109815579 | 0 | 0 | 0 | 1 | 0 |
| 68  | chr1:110233510-110247811 | 0 | 0 | 0 | 1 | 0 |
| 69  | chr1:110880346-110941958 | 1 | 0 | 0 | 0 | 0 |
| 70  | chr1:111613968-111642803 | 0 | 1 | 0 | 1 | 0 |
| 71  | chr1:111959282-111977077 | 0 | 0 | 0 | 1 | 0 |
| 72  | chr1:112987649-113007101 | 0 | 0 | 0 | 1 | 0 |
| 73  | chr1:113340933-113364404 | 0 | 0 | 0 | 1 | 0 |
| 74  | chr1:114099203-114115596 | 0 | 0 | 0 | 1 | 0 |
| 75  | chr1:114631409-114718134 | 1 | 1 | 0 | 1 | 0 |
| 76  | chr1:114912020-114927292 | 0 | 0 | 0 | 1 | 0 |
| 77  | chr1:115156798-115178662 | 0 | 0 | 0 | 1 | 0 |
| 78  | chr1:115208422-115234438 | 0 | 0 | 0 | 1 | 0 |
| 79  | chr1:115260471-115329604 | 0 | 0 | 0 | 1 | 0 |
| 80  | chr1:115412042-115472278 | 1 | 1 | 0 | 1 | 0 |
| 81  | chr1:115971283-115989519 | 0 | 0 | 0 | 1 | 0 |
| 82  | chr1:117010703-117024841 | 0 | 0 | 0 | 1 | 0 |
| 83  | chr1:119398855-119423536 | 0 | 0 | 0 | 1 | 0 |
| 84  | chr1:120002222-120021539 | 0 | 0 | 0 | 1 | 0 |
| 85  | chr1:120216872-120236307 | 0 | 0 | 0 | 1 | 0 |
| 86  | chr1:121253029-121286091 | 0 | 0 | 0 | 1 | 0 |
| 87  | chr1:121367360-121396431 | 0 | 0 | 0 | 1 | 0 |
| 88  | chr1:121580654-121596996 | 0 | 0 | 0 | 1 | 0 |
| 89  | chr1:121812079-121830453 | 0 | 0 | 0 | 1 | 0 |
| 90  | chr1:123351166-123371826 | 0 | 0 | 0 | 1 | 0 |
| 91  | chr1:123462572-123486226 | 0 | 0 | 0 | 1 | 0 |
| 92  | chr1:123700987-123717466 | 0 | 0 | 0 | 1 | 0 |
| 93  | chr1:124611126-124629338 | 0 | 0 | 0 | 1 | 0 |
| 94  | chr1:125485244-125500485 | 0 | 0 | 0 | 1 | 0 |
| 95  | chr2:6937752-7344511     | 1 | 1 | 0 | 1 | 0 |
| 96  | chr2:7465432-8002404     | 1 | 1 | 0 | 1 | 0 |
| 97  | chr2:8067467-8671097     | 1 | 1 | 0 | 1 | 0 |
| 98  | chr2:8690906-8897261     | 1 | 1 | 0 | 1 | 0 |
| 99  | chr2:9195149-9215457     | 1 | 0 | 0 | 0 | 0 |
| 100 | chr2:9250664-9270777     | 1 | 0 | 0 | 0 | 0 |
| 101 | chr2:9289070-9341263     | 1 | 0 | 0 | 1 | 0 |

|     |                        |   |   |   |   |   |
|-----|------------------------|---|---|---|---|---|
| 102 | chr2:9346941-9664062   | 1 | 0 | 0 | 1 | 0 |
| 103 | chr2:10668800-10688296 | 0 | 0 | 0 | 1 | 0 |
| 104 | chr2:10832545-10847840 | 0 | 0 | 0 | 1 | 0 |
| 105 | chr2:12859189-12879789 | 0 | 1 | 0 | 1 | 0 |
| 106 | chr2:16344231-16383006 | 1 | 0 | 0 | 1 | 0 |
| 107 | chr2:16609941-16682417 | 1 | 0 | 0 | 1 | 0 |
| 108 | chr2:17384236-17409701 | 0 | 1 | 0 | 1 | 0 |
| 109 | chr2:19322578-19337960 | 0 | 0 | 0 | 1 | 0 |
| 110 | chr2:20393148-20442004 | 1 | 1 | 0 | 1 | 0 |
| 111 | chr2:20533007-20547177 | 0 | 0 | 0 | 1 | 0 |
| 112 | chr2:20735044-20765084 | 1 | 1 | 0 | 1 | 0 |
| 113 | chr2:20879135-20963539 | 0 | 1 | 0 | 1 | 0 |
| 114 | chr2:21064053-21272262 | 1 | 1 | 0 | 1 | 0 |
| 115 | chr2:24576426-24590515 | 0 | 0 | 0 | 1 | 0 |
| 116 | chr2:26022033-26099460 | 1 | 1 | 1 | 1 | 0 |
| 117 | chr2:26597057-26618101 | 0 | 1 | 0 | 1 | 0 |
| 118 | chr2:32087247-32106773 | 0 | 0 | 0 | 1 | 0 |
| 119 | chr2:33001971-33020446 | 0 | 0 | 0 | 1 | 0 |
| 120 | chr2:38745009-38783072 | 1 | 1 | 0 | 1 | 0 |
| 121 | chr2:38801450-38848052 | 0 | 1 | 0 | 1 | 0 |
| 122 | chr2:39084100-39107277 | 1 | 0 | 0 | 0 | 0 |
| 123 | chr2:39215152-39234408 | 0 | 1 | 0 | 1 | 0 |
| 124 | chr2:39808519-39862903 | 0 | 0 | 1 | 0 | 0 |
| 125 | chr2:45313786-45331432 | 0 | 0 | 0 | 1 | 0 |
| 126 | chr2:48673677-48690945 | 0 | 1 | 0 | 1 | 0 |
| 127 | chr2:49389395-49403677 | 0 | 0 | 0 | 1 | 0 |
| 128 | chr2:49675101-49729636 | 0 | 1 | 1 | 1 | 0 |
| 129 | chr2:50269550-50369550 | 0 | 0 | 0 | 0 | 1 |
| 130 | chr2:54746452-54763754 | 0 | 0 | 0 | 1 | 0 |
| 131 | chr2:55923786-55946502 | 0 | 1 | 0 | 1 | 0 |
| 132 | chr2:59176253-59191703 | 0 | 0 | 0 | 1 | 0 |
| 133 | chr2:60302292-60596222 | 1 | 1 | 0 | 0 | 0 |
| 134 | chr2:60748726-60770490 | 1 | 0 | 0 | 0 | 0 |
| 135 | chr2:63717840-63733934 | 0 | 0 | 0 | 1 | 0 |
| 136 | chr2:65677798-65693102 | 0 | 0 | 0 | 1 | 0 |
| 137 | chr2:66666072-66683567 | 0 | 0 | 0 | 1 | 0 |
| 138 | chr2:67315587-67329803 | 0 | 0 | 0 | 1 | 0 |
| 139 | chr2:68148519-68186928 | 1 | 0 | 0 | 0 | 0 |
| 140 | chr2:68406274-68424835 | 0 | 0 | 0 | 1 | 0 |
| 141 | chr2:70859864-70875179 | 0 | 0 | 0 | 1 | 0 |
| 142 | chr2:72207268-72223660 | 0 | 0 | 0 | 1 | 0 |
| 143 | chr2:72345433-72360746 | 0 | 0 | 0 | 1 | 0 |
| 144 | chr2:73666480-73680700 | 0 | 0 | 0 | 1 | 0 |
| 145 | chr2:74086211-74102310 | 0 | 0 | 0 | 1 | 0 |
| 146 | chr2:76152533-76167744 | 0 | 0 | 0 | 1 | 0 |
| 147 | chr2:79579670-79593973 | 0 | 0 | 0 | 1 | 0 |
| 148 | chr2:79706845-79725195 | 0 | 0 | 0 | 1 | 0 |
| 149 | chr2:80727050-80756805 | 0 | 1 | 0 | 0 | 0 |
| 150 | chr2:82686402-82700522 | 0 | 0 | 0 | 1 | 0 |
| 151 | chr2:82896397-82913662 | 0 | 0 | 0 | 1 | 0 |
| 152 | chr2:83156387-83175916 | 0 | 0 | 0 | 1 | 0 |
| 153 | chr2:83389857-83406141 | 0 | 0 | 0 | 1 | 0 |

|     |                        |   |   |   |   |   |
|-----|------------------------|---|---|---|---|---|
| 154 | chr2:83557615-83575017 | 0 | 0 | 0 | 1 | 0 |
| 155 | chr2:84970506-84989964 | 0 | 0 | 0 | 1 | 0 |
| 156 | chr2:85419745-85436022 | 0 | 0 | 0 | 1 | 0 |
| 157 | chr2:85844001-85871057 | 1 | 0 | 0 | 0 | 0 |
| 158 | chr2:86045773-86084071 | 0 | 0 | 0 | 1 | 0 |
| 159 | chr2:86444251-86460556 | 0 | 0 | 0 | 1 | 0 |
| 160 | chr2:86689359-86716448 | 1 | 1 | 0 | 1 | 0 |
| 161 | chr2:86809122-87032410 | 1 | 1 | 1 | 1 | 0 |
| 162 | chr3:3035595-3054185   | 1 | 0 | 0 | 0 | 0 |
| 163 | chr3:11491027-11512259 | 1 | 0 | 0 | 0 | 0 |
| 164 | chr3:15527958-15543350 | 0 | 0 | 0 | 1 | 0 |
| 165 | chr3:15963943-15980085 | 0 | 0 | 0 | 1 | 0 |
| 166 | chr3:20408514-20425866 | 0 | 0 | 0 | 1 | 0 |
| 167 | chr3:20755751-20775177 | 0 | 0 | 0 | 1 | 0 |
| 168 | chr3:24344541-24363999 | 0 | 1 | 0 | 1 | 0 |
| 169 | chr3:25552440-25566633 | 0 | 0 | 0 | 1 | 0 |
| 170 | chr3:26051916-26151916 | 0 | 0 | 0 | 1 | 1 |
| 171 | chr3:26906990-26922200 | 0 | 0 | 0 | 1 | 0 |
| 172 | chr3:30551123-30569520 | 0 | 0 | 0 | 1 | 0 |
| 173 | chr3:30625661-30645222 | 0 | 0 | 0 | 1 | 0 |
| 174 | chr3:33558565-33573230 | 0 | 0 | 0 | 1 | 0 |
| 175 | chr3:34147139-34446301 | 1 | 1 | 0 | 1 | 0 |
| 176 | chr3:34480078-34505701 | 0 | 0 | 0 | 1 | 0 |
| 177 | chr3:36091319-36106467 | 0 | 0 | 0 | 1 | 0 |
| 178 | chr3:36499571-36517160 | 0 | 0 | 0 | 1 | 0 |
| 179 | chr3:38570956-38600036 | 1 | 0 | 0 | 0 | 0 |
| 180 | chr3:39327351-39381771 | 0 | 1 | 0 | 1 | 0 |
| 181 | chr3:48273124-48373124 | 0 | 0 | 0 | 0 | 1 |
| 182 | chr3:51348214-51369154 | 0 | 0 | 0 | 1 | 0 |
| 183 | chr3:52417499-52437033 | 0 | 0 | 0 | 1 | 0 |
| 184 | chr3:54220968-54235231 | 0 | 0 | 0 | 1 | 0 |
| 185 | chr3:54487175-54504622 | 0 | 0 | 0 | 1 | 0 |
| 186 | chr3:54525671-54542096 | 0 | 0 | 0 | 1 | 0 |
| 187 | chr3:54667835-54685056 | 0 | 0 | 0 | 1 | 0 |
| 188 | chr3:54738262-54753502 | 0 | 0 | 0 | 1 | 0 |
| 189 | chr3:55730442-55752171 | 0 | 0 | 0 | 1 | 0 |
| 190 | chr3:56411806-56437854 | 0 | 0 | 0 | 1 | 0 |
| 191 | chr3:57859183-57875499 | 0 | 0 | 0 | 1 | 0 |
| 192 | chr3:59398705-59413009 | 0 | 0 | 0 | 1 | 0 |
| 193 | chr3:60003863-60018016 | 0 | 0 | 0 | 1 | 0 |
| 194 | chr3:60430431-60451911 | 0 | 0 | 0 | 1 | 0 |
| 195 | chr3:61162303-61180735 | 0 | 0 | 0 | 1 | 0 |
| 196 | chr3:64324102-64342360 | 0 | 0 | 0 | 1 | 0 |
| 197 | chr3:69705871-69724320 | 0 | 0 | 0 | 1 | 0 |
| 198 | chr3:70576673-70593025 | 0 | 0 | 0 | 1 | 0 |
| 199 | chr3:71156303-71175694 | 0 | 0 | 0 | 1 | 0 |
| 200 | chr3:71427491-71464942 | 1 | 1 | 0 | 1 | 0 |
| 201 | chr3:71925082-71944747 | 0 | 0 | 0 | 1 | 0 |
| 202 | chr3:71956663-71981542 | 0 | 0 | 0 | 1 | 0 |
| 203 | chr3:72050603-72075362 | 0 | 0 | 0 | 1 | 0 |
| 204 | chr3:74227292-74354522 | 0 | 1 | 0 | 0 | 0 |
| 205 | chr3:74637875-74653037 | 0 | 0 | 0 | 1 | 0 |

|     |                        |   |   |   |   |   |
|-----|------------------------|---|---|---|---|---|
| 206 | chr3:74943417-74966259 | 0 | 0 | 0 | 1 | 0 |
| 207 | chr3:75330892-75347103 | 0 | 1 | 0 | 1 | 0 |
| 208 | chr3:76343002-76374076 | 0 | 1 | 0 | 1 | 0 |
| 209 | chr3:77052929-77074565 | 0 | 0 | 0 | 1 | 0 |
| 210 | chr3:84938901-84954398 | 0 | 0 | 0 | 1 | 0 |
| 211 | chr3:89639311-89654708 | 0 | 0 | 0 | 1 | 0 |
| 212 | chr3:90017648-90032351 | 0 | 0 | 0 | 1 | 0 |
| 213 | chr3:92398093-92419610 | 0 | 1 | 0 | 1 | 0 |
| 214 | chr3:93638750-93658328 | 0 | 1 | 0 | 1 | 0 |
| 215 | chr3:94380307-94402996 | 0 | 0 | 0 | 1 | 0 |
| 216 | chr4:3098903-3149905   | 0 | 1 | 0 | 1 | 0 |
| 217 | chr4:4093733-4115163   | 0 | 0 | 0 | 1 | 0 |
| 218 | chr4:5340132-5355410   | 0 | 0 | 0 | 1 | 0 |
| 219 | chr4:6012868-6033281   | 0 | 1 | 0 | 1 | 0 |
| 220 | chr4:11019949-11035203 | 0 | 0 | 0 | 1 | 0 |
| 221 | chr4:13099421-13125085 | 0 | 1 | 0 | 1 | 0 |
| 222 | chr4:13457039-13471935 | 0 | 1 | 0 | 1 | 0 |
| 223 | chr4:15272536-15287761 | 0 | 0 | 0 | 1 | 0 |
| 224 | chr4:18914276-18948422 | 0 | 1 | 0 | 1 | 0 |
| 225 | chr4:19801539-19827525 | 0 | 1 | 0 | 1 | 0 |
| 226 | chr4:21137148-21200806 | 0 | 0 | 1 | 0 | 0 |
| 227 | chr4:26270379-26284584 | 0 | 0 | 0 | 1 | 0 |
| 228 | chr4:30495780-30595780 | 1 | 0 | 0 | 0 | 1 |
| 229 | chr4:31146500-31168045 | 0 | 0 | 0 | 1 | 0 |
| 230 | chr4:32780995-32807116 | 0 | 0 | 0 | 1 | 0 |
| 231 | chr4:33835234-33851601 | 0 | 0 | 0 | 1 | 0 |
| 232 | chr4:35062142-35078546 | 0 | 0 | 0 | 1 | 0 |
| 233 | chr4:35270211-35284595 | 0 | 0 | 0 | 1 | 0 |
| 234 | chr4:36165454-36180610 | 0 | 0 | 0 | 1 | 0 |
| 235 | chr4:37007720-37028160 | 0 | 0 | 0 | 1 | 0 |
| 236 | chr4:39775616-39792985 | 0 | 1 | 0 | 1 | 0 |
| 237 | chr4:40101162-40119640 | 0 | 1 | 0 | 1 | 0 |
| 238 | chr4:40291238-40355985 | 0 | 1 | 0 | 1 | 0 |
| 239 | chr4:41170228-41187667 | 0 | 0 | 0 | 1 | 0 |
| 240 | chr4:44002925-44018103 | 0 | 0 | 0 | 1 | 0 |
| 241 | chr4:44692595-44709701 | 0 | 0 | 0 | 1 | 0 |
| 242 | chr4:51004846-51018996 | 0 | 0 | 0 | 1 | 0 |
| 243 | chr4:51841860-51861494 | 0 | 0 | 0 | 1 | 0 |
| 244 | chr4:53488500-53588500 | 0 | 0 | 0 | 0 | 1 |
| 245 | chr4:57679302-57743303 | 0 | 0 | 1 | 0 | 0 |
| 246 | chr4:59827159-59846670 | 0 | 1 | 0 | 1 | 0 |
| 247 | chr4:61441171-61463512 | 1 | 0 | 0 | 1 | 0 |
| 248 | chr4:61615878-61632165 | 0 | 0 | 0 | 1 | 0 |
| 249 | chr4:62280725-62301200 | 0 | 0 | 0 | 1 | 0 |
| 250 | chr4:63542354-63627370 | 0 | 0 | 1 | 1 | 0 |
| 251 | chr4:65733662-65751092 | 0 | 0 | 0 | 1 | 0 |
| 252 | chr4:66066703-66086199 | 0 | 1 | 0 | 1 | 0 |
| 253 | chr4:66243787-66259004 | 0 | 0 | 0 | 1 | 0 |
| 254 | chr4:67702004-67718239 | 0 | 0 | 0 | 1 | 0 |
| 255 | chr4:69745893-69763241 | 0 | 0 | 0 | 1 | 0 |
| 256 | chr4:70688966-70720060 | 0 | 1 | 0 | 1 | 0 |
| 257 | chr4:71606943-71622110 | 0 | 0 | 0 | 1 | 0 |

|     |                        |   |   |   |   |   |
|-----|------------------------|---|---|---|---|---|
| 258 | chr4:73578094-73595558 | 0 | 0 | 0 | 1 | 0 |
| 259 | chr4:73773301-73790457 | 0 | 0 | 0 | 1 | 0 |
| 260 | chr4:77200642-77214817 | 0 | 0 | 0 | 1 | 0 |
| 261 | chr4:77649573-77679587 | 0 | 1 | 0 | 1 | 0 |
| 262 | chr4:78667758-78681984 | 0 | 0 | 0 | 1 | 0 |
| 263 | chr4:80044081-80058146 | 0 | 0 | 0 | 1 | 0 |
| 264 | chr4:80704204-80719407 | 0 | 0 | 0 | 1 | 0 |
| 265 | chr4:81111133-81130524 | 0 | 0 | 0 | 1 | 0 |
| 266 | chr4:85396521-85415056 | 0 | 0 | 0 | 1 | 0 |
| 267 | chr4:86654851-86676432 | 0 | 0 | 0 | 1 | 0 |
| 268 | chr4:87620723-87637929 | 0 | 0 | 0 | 1 | 0 |
| 269 | chr4:89280530-89295926 | 0 | 0 | 0 | 1 | 0 |
| 270 | chr4:89522399-89539561 | 0 | 0 | 0 | 1 | 0 |
| 271 | chr4:89716460-89732654 | 0 | 0 | 0 | 1 | 0 |
| 272 | chr4:90657700-90680209 | 0 | 0 | 0 | 1 | 0 |
| 273 | chr4:91215881-91229914 | 0 | 0 | 0 | 1 | 0 |
| 274 | chr5:2996081-3074982   | 1 | 1 | 0 | 1 | 0 |
| 275 | chr5:4300227-4314579   | 0 | 1 | 0 | 0 | 0 |
| 276 | chr5:11240988-11259250 | 0 | 0 | 0 | 1 | 0 |
| 277 | chr5:11734973-11750705 | 0 | 0 | 0 | 1 | 0 |
| 278 | chr5:13118625-13137250 | 0 | 0 | 0 | 1 | 0 |
| 279 | chr5:14549542-14570136 | 0 | 0 | 0 | 1 | 0 |
| 280 | chr5:15858158-15872445 | 0 | 0 | 0 | 1 | 0 |
| 281 | chr5:16383332-16399634 | 0 | 0 | 0 | 1 | 0 |
| 282 | chr5:18950931-18969283 | 0 | 0 | 0 | 1 | 0 |
| 283 | chr5:25390148-25406345 | 0 | 0 | 0 | 1 | 0 |
| 284 | chr5:26086151-26102433 | 0 | 0 | 0 | 1 | 0 |
| 285 | chr5:28879694-28901980 | 0 | 1 | 0 | 1 | 0 |
| 286 | chr5:31040478-31062529 | 0 | 0 | 0 | 1 | 0 |
| 287 | chr5:31095735-31111975 | 0 | 0 | 0 | 1 | 0 |
| 288 | chr5:32833617-32856245 | 0 | 0 | 0 | 1 | 0 |
| 289 | chr5:33061557-33083734 | 1 | 0 | 0 | 0 | 0 |
| 290 | chr5:33098635-33112663 | 0 | 0 | 0 | 1 | 0 |
| 291 | chr5:34093139-34175180 | 0 | 0 | 1 | 0 | 0 |
| 292 | chr5:38499340-38516797 | 0 | 0 | 0 | 1 | 0 |
| 293 | chr5:38726264-38742753 | 0 | 0 | 0 | 1 | 0 |
| 294 | chr5:38843379-38857542 | 0 | 0 | 0 | 1 | 0 |
| 295 | chr5:40574428-40589826 | 0 | 0 | 0 | 1 | 0 |
| 296 | chr5:41795848-41809946 | 0 | 0 | 0 | 1 | 0 |
| 297 | chr5:42030918-42052339 | 0 | 0 | 0 | 1 | 0 |
| 298 | chr5:42256289-42275914 | 0 | 1 | 0 | 1 | 0 |
| 299 | chr5:44115860-44137322 | 0 | 0 | 0 | 1 | 0 |
| 300 | chr5:44956842-44979505 | 0 | 1 | 0 | 0 | 0 |
| 301 | chr5:46335506-46353958 | 0 | 0 | 0 | 1 | 0 |
| 302 | chr5:47601449-47615750 | 0 | 0 | 0 | 1 | 0 |
| 303 | chr5:49764928-49786381 | 0 | 0 | 0 | 1 | 0 |
| 304 | chr5:49818962-49838363 | 0 | 1 | 0 | 1 | 0 |
| 305 | chr5:52878803-52892905 | 0 | 0 | 0 | 1 | 0 |
| 306 | chr5:53084589-53098882 | 0 | 1 | 0 | 1 | 0 |
| 307 | chr5:57216555-57230850 | 0 | 0 | 0 | 1 | 0 |
| 308 | chr5:59554851-59576500 | 0 | 0 | 0 | 1 | 0 |
| 309 | chr5:61424520-61524520 | 0 | 0 | 0 | 0 | 1 |

|     |                        |   |   |   |   |   |
|-----|------------------------|---|---|---|---|---|
| 310 | chr5:61711614-61727986 | 0 | 0 | 0 | 1 | 0 |
| 311 | chr5:62369977-62385237 | 0 | 0 | 0 | 1 | 0 |
| 312 | chr5:68858135-68877436 | 0 | 0 | 0 | 1 | 0 |
| 313 | chr5:70246459-70260744 | 0 | 0 | 0 | 1 | 0 |
| 314 | chr5:72643311-72658594 | 0 | 0 | 0 | 1 | 0 |
| 315 | chr5:75358999-75374210 | 0 | 0 | 0 | 1 | 0 |
| 316 | chr5:78662688-78677966 | 0 | 0 | 0 | 1 | 0 |
| 317 | chr5:81143006-81475905 | 0 | 1 | 1 | 1 | 0 |
| 318 | chr5:83273029-83288164 | 0 | 1 | 0 | 1 | 0 |
| 319 | chr5:83805336-83819678 | 0 | 0 | 0 | 1 | 0 |
| 320 | chr5:84060003-84160003 | 0 | 0 | 0 | 0 | 1 |
| 321 | chr5:84796587-84816756 | 0 | 0 | 0 | 1 | 0 |
| 322 | chr5:86179277-86212449 | 0 | 0 | 0 | 1 | 0 |
| 323 | chr5:86567046-86583391 | 0 | 0 | 0 | 1 | 0 |
| 324 | chr5:87903603-87917871 | 0 | 0 | 0 | 1 | 0 |
| 325 | chr5:88633863-88657358 | 0 | 0 | 0 | 1 | 0 |
| 326 | chr5:90973772-90994346 | 0 | 0 | 0 | 1 | 0 |
| 327 | chr5:91187041-91201280 | 0 | 0 | 0 | 1 | 0 |
| 328 | chr5:91354516-91374904 | 0 | 0 | 0 | 1 | 0 |
| 329 | chr6:7394764-7412257   | 0 | 0 | 0 | 1 | 0 |
| 330 | chr6:8284327-8298570   | 0 | 0 | 0 | 1 | 0 |
| 331 | chr6:11634410-11650018 | 0 | 0 | 0 | 1 | 0 |
| 332 | chr6:11795814-11829236 | 0 | 1 | 0 | 1 | 0 |
| 333 | chr6:12022963-12040287 | 0 | 0 | 0 | 1 | 0 |
| 334 | chr6:12736643-12771611 | 1 | 0 | 0 | 0 | 0 |
| 335 | chr6:12785979-12929586 | 1 | 1 | 1 | 1 | 0 |
| 336 | chr6:14360605-14377929 | 0 | 0 | 0 | 1 | 0 |
| 337 | chr6:15054478-15093875 | 1 | 1 | 0 | 1 | 0 |
| 338 | chr6:15175203-15190411 | 0 | 0 | 0 | 1 | 0 |
| 339 | chr6:17462041-17476115 | 0 | 0 | 0 | 1 | 0 |
| 340 | chr6:17543174-17605613 | 0 | 0 | 0 | 1 | 0 |
| 341 | chr6:19046345-19065819 | 0 | 0 | 0 | 1 | 0 |
| 342 | chr6:19730239-19748092 | 0 | 1 | 0 | 1 | 0 |
| 343 | chr6:19834036-19894972 | 1 | 0 | 0 | 0 | 0 |
| 344 | chr6:20078345-20093479 | 0 | 0 | 0 | 1 | 0 |
| 345 | chr6:21876547-21890551 | 0 | 0 | 0 | 1 | 0 |
| 346 | chr6:29125009-29155013 | 1 | 0 | 0 | 0 | 0 |
| 347 | chr6:29893060-29907298 | 0 | 0 | 0 | 1 | 0 |
| 348 | chr6:31207016-31222451 | 0 | 1 | 0 | 1 | 0 |
| 349 | chr6:31899151-31916281 | 0 | 0 | 0 | 1 | 0 |
| 350 | chr6:33331518-33348710 | 0 | 0 | 0 | 1 | 0 |
| 351 | chr6:37666223-37688817 | 0 | 1 | 0 | 1 | 0 |
| 352 | chr6:38240447-38293585 | 0 | 1 | 0 | 1 | 0 |
| 353 | chr6:39557092-39573470 | 0 | 0 | 0 | 1 | 0 |
| 354 | chr6:40876217-40974223 | 1 | 0 | 0 | 0 | 0 |
| 355 | chr6:43552234-43582804 | 1 | 0 | 0 | 0 | 0 |
| 356 | chr6:43692666-43808091 | 1 | 0 | 1 | 1 | 0 |
| 357 | chr6:46117146-46149042 | 1 | 1 | 0 | 1 | 0 |
| 358 | chr6:47537888-47559526 | 0 | 1 | 0 | 1 | 0 |
| 359 | chr6:48247942-50166652 | 1 | 1 | 1 | 1 | 0 |
| 360 | chr6:50232414-50250053 | 0 | 0 | 0 | 1 | 0 |
| 361 | chr6:51950115-51971829 | 0 | 0 | 0 | 1 | 0 |

|     |                        |   |   |   |   |   |
|-----|------------------------|---|---|---|---|---|
| 362 | chr6:53687008-53701073 | 0 | 0 | 0 | 1 | 0 |
| 363 | chr6:55915769-55940485 | 0 | 1 | 0 | 1 | 0 |
| 364 | chr6:60888058-60907036 | 0 | 0 | 0 | 1 | 0 |
| 365 | chr6:61814200-61829442 | 0 | 0 | 0 | 1 | 0 |
| 366 | chr6:62774801-62788980 | 0 | 0 | 0 | 1 | 0 |
| 367 | chr6:64382458-64399653 | 0 | 0 | 0 | 1 | 0 |
| 368 | chr6:67213485-67230771 | 0 | 0 | 0 | 1 | 0 |
| 369 | chr6:67345888-67445888 | 0 | 0 | 0 | 0 | 1 |
| 370 | chr6:67925327-67943811 | 0 | 1 | 0 | 1 | 0 |
| 371 | chr6:69221891-69239221 | 0 | 0 | 0 | 1 | 0 |
| 372 | chr6:71263479-71281877 | 0 | 0 | 0 | 1 | 0 |
| 373 | chr6:71519460-71534941 | 0 | 0 | 0 | 1 | 0 |
| 374 | chr6:72794429-72809552 | 0 | 0 | 0 | 1 | 0 |
| 375 | chr6:73429809-73447218 | 0 | 0 | 0 | 1 | 0 |
| 376 | chr6:73620652-73635941 | 0 | 0 | 0 | 1 | 0 |
| 377 | chr6:73728825-73743175 | 0 | 0 | 0 | 1 | 0 |
| 378 | chr6:74131783-74159556 | 0 | 1 | 0 | 1 | 0 |
| 379 | chr6:74824389-74841659 | 0 | 0 | 0 | 1 | 0 |
| 380 | chr6:75460915-75475081 | 0 | 0 | 0 | 1 | 0 |
| 381 | chr6:76701751-76716122 | 0 | 0 | 0 | 1 | 0 |
| 382 | chr6:78363491-78379552 | 0 | 0 | 0 | 1 | 0 |
| 383 | chr6:79261889-79279277 | 0 | 0 | 0 | 1 | 0 |
| 384 | chr6:79296620-79311884 | 0 | 0 | 0 | 1 | 0 |
| 385 | chr6:79573233-79589548 | 0 | 0 | 0 | 1 | 0 |
| 386 | chr6:79794305-79812698 | 0 | 0 | 0 | 1 | 0 |
| 387 | chr7:9834685-9850856   | 0 | 0 | 0 | 1 | 0 |
| 388 | chr7:14389504-14406941 | 0 | 0 | 0 | 1 | 0 |
| 389 | chr7:17520754-17544424 | 0 | 0 | 0 | 1 | 0 |
| 390 | chr7:18395857-18428705 | 0 | 1 | 0 | 1 | 0 |
| 391 | chr7:23616250-23630571 | 0 | 0 | 0 | 1 | 0 |
| 392 | chr7:24668013-24768013 | 0 | 0 | 0 | 0 | 1 |
| 393 | chr7:27836341-27853656 | 0 | 0 | 0 | 1 | 0 |
| 394 | chr7:30130624-30151069 | 0 | 1 | 0 | 1 | 0 |
| 395 | chr7:30203047-30222582 | 0 | 1 | 0 | 1 | 0 |
| 396 | chr7:33770591-33786905 | 0 | 0 | 0 | 1 | 0 |
| 397 | chr7:34887012-34907587 | 0 | 0 | 0 | 1 | 0 |
| 398 | chr7:35187243-35206591 | 0 | 0 | 0 | 1 | 0 |
| 399 | chr7:35427773-35441875 | 0 | 0 | 0 | 1 | 0 |
| 400 | chr7:42097650-42113901 | 0 | 0 | 0 | 1 | 0 |
| 401 | chr7:42264801-42280974 | 0 | 0 | 0 | 1 | 0 |
| 402 | chr7:42785667-42802009 | 0 | 0 | 0 | 1 | 0 |
| 403 | chr7:43223795-43239117 | 0 | 0 | 0 | 1 | 0 |
| 404 | chr7:43381751-43401320 | 0 | 1 | 0 | 1 | 0 |
| 405 | chr7:43711751-43776141 | 1 | 1 | 0 | 1 | 0 |
| 406 | chr7:43891291-43905466 | 0 | 0 | 0 | 1 | 0 |
| 407 | chr7:44215060-44234507 | 0 | 0 | 0 | 1 | 0 |
| 408 | chr7:46759465-46785299 | 0 | 1 | 0 | 1 | 0 |
| 409 | chr7:47881499-47904198 | 0 | 0 | 0 | 1 | 0 |
| 410 | chr7:49195585-49215208 | 0 | 0 | 0 | 1 | 0 |
| 411 | chr7:50284442-50298663 | 0 | 0 | 0 | 1 | 0 |
| 412 | chr7:53988415-54088415 | 0 | 0 | 0 | 0 | 1 |
| 413 | chr7:57302673-57322130 | 0 | 0 | 0 | 1 | 0 |



|     |                        |   |   |   |   |   |
|-----|------------------------|---|---|---|---|---|
| 414 | chr7:58285371-58300725 | 0 | 0 | 0 | 1 | 0 |
| 415 | chr7:62333189-62354775 | 0 | 1 | 0 | 1 | 0 |
| 416 | chr7:63045588-63070105 | 0 | 0 | 0 | 1 | 0 |
| 417 | chr7:64062188-64080651 | 0 | 0 | 0 | 1 | 0 |
| 418 | chr7:65062670-65080961 | 0 | 0 | 0 | 1 | 0 |
| 419 | chr7:70556322-70584206 | 0 | 1 | 0 | 1 | 0 |
| 420 | chr7:71544449-71565631 | 0 | 1 | 0 | 1 | 0 |
| 421 | chr7:72200401-72214579 | 0 | 0 | 0 | 1 | 0 |
| 422 | chr7:74216313-74280062 | 0 | 1 | 0 | 1 | 0 |
| 423 | chr7:76844681-76858777 | 0 | 0 | 0 | 1 | 0 |
| 424 | chr7:77548998-77563162 | 0 | 0 | 0 | 1 | 0 |
| 425 | chr7:77950247-77968413 | 0 | 1 | 0 | 1 | 0 |
| 426 | chr7:79735722-79790353 | 0 | 0 | 1 | 0 | 0 |
| 427 | chr7:82068403-82085556 | 0 | 0 | 0 | 1 | 0 |
| 428 | chr7:82404092-82432964 | 0 | 1 | 0 | 1 | 0 |
| 429 | chr7:83247599-83263842 | 0 | 0 | 0 | 1 | 0 |
| 430 | chr7:83956919-83992106 | 1 | 0 | 0 | 0 | 0 |
| 431 | chr8:3052358-3094061   | 1 | 0 | 0 | 1 | 0 |
| 432 | chr8:3143456-3162881   | 0 | 1 | 0 | 1 | 0 |
| 433 | chr8:3466112-3752747   | 0 | 1 | 0 | 1 | 0 |
| 434 | chr8:4554651-4662058   | 0 | 1 | 0 | 1 | 0 |
| 435 | chr8:5239689-5439539   | 1 | 0 | 0 | 0 | 0 |
| 436 | chr8:6632387-6672858   | 0 | 1 | 0 | 1 | 0 |
| 437 | chr8:9320910-9334977   | 0 | 0 | 0 | 1 | 0 |
| 438 | chr8:11348806-11370805 | 0 | 1 | 0 | 1 | 0 |
| 439 | chr8:11399935-11426053 | 0 | 1 | 0 | 1 | 0 |
| 440 | chr8:13303548-13320664 | 0 | 1 | 0 | 1 | 0 |
| 441 | chr8:16283803-16298049 | 0 | 0 | 0 | 1 | 0 |
| 442 | chr8:16423354-16441573 | 0 | 0 | 0 | 1 | 0 |
| 443 | chr8:19440384-19463274 | 0 | 1 | 0 | 1 | 0 |
| 444 | chr8:19487676-19537676 | 0 | 0 | 0 | 0 | 1 |
| 445 | chr8:21421310-21442757 | 0 | 1 | 0 | 1 | 0 |
| 446 | chr8:22552030-22729253 | 0 | 1 | 0 | 0 | 0 |
| 447 | chr8:23361271-23405915 | 0 | 1 | 0 | 1 | 0 |
| 448 | chr8:27514775-27533312 | 0 | 0 | 0 | 1 | 0 |
| 449 | chr8:31264442-31280561 | 0 | 0 | 0 | 1 | 0 |
| 450 | chr8:36757467-36783376 | 0 | 1 | 0 | 1 | 0 |
| 451 | chr8:41063788-41080117 | 0 | 1 | 0 | 1 | 0 |
| 452 | chr8:47137418-47160360 | 0 | 1 | 0 | 1 | 0 |
| 453 | chr8:47183377-48074839 | 1 | 1 | 0 | 1 | 0 |
| 454 | chr8:53746856-53785621 | 0 | 1 | 0 | 1 | 0 |
| 455 | chr8:57839964-57857497 | 0 | 0 | 0 | 1 | 0 |
| 456 | chr8:57987301-58002411 | 0 | 0 | 0 | 1 | 0 |
| 457 | chr8:59108084-59139186 | 1 | 1 | 0 | 1 | 0 |
| 458 | chr8:62740272-62755555 | 0 | 0 | 0 | 1 | 0 |
| 459 | chr8:63041880-63058577 | 0 | 0 | 0 | 1 | 0 |
| 460 | chr8:63746451-63763641 | 0 | 0 | 0 | 1 | 0 |
| 461 | chr8:64387696-64407026 | 0 | 0 | 0 | 1 | 0 |
| 462 | chr8:64818315-64837622 | 0 | 0 | 0 | 1 | 0 |
| 463 | chr8:65955819-65975359 | 0 | 0 | 0 | 1 | 0 |
| 464 | chr8:66624618-66651236 | 0 | 0 | 0 | 1 | 0 |
| 465 | chr8:66938822-66955276 | 0 | 0 | 0 | 1 | 0 |

|     |                         |   |   |   |   |   |
|-----|-------------------------|---|---|---|---|---|
| 466 | chr8:68150016-68168360  | 0 | 0 | 0 | 1 | 0 |
| 467 | chr8:68636237-68658815  | 0 | 0 | 0 | 1 | 0 |
| 468 | chr8:68683678-68702955  | 0 | 0 | 0 | 1 | 0 |
| 469 | chr8:68803360-68826204  | 0 | 0 | 0 | 1 | 0 |
| 470 | chr8:69369915-69390420  | 0 | 0 | 0 | 1 | 0 |
| 471 | chr8:69812210-69827380  | 0 | 0 | 0 | 1 | 0 |
| 472 | chr8:72846503-72860806  | 0 | 0 | 0 | 1 | 0 |
| 473 | chr8:74948962-74971824  | 0 | 0 | 0 | 1 | 0 |
| 474 | chr8:76089443-76156150  | 1 | 0 | 0 | 0 | 0 |
| 475 | chr8:76220436-76269535  | 1 | 0 | 0 | 1 | 0 |
| 476 | chr8:76331651-77310517  | 1 | 1 | 1 | 1 | 0 |
| 477 | chr9:6917096-6933416    | 0 | 0 | 0 | 1 | 0 |
| 478 | chr9:9044602-9064918    | 0 | 1 | 0 | 0 | 0 |
| 479 | chr9:10409074-10550071  | 1 | 1 | 0 | 1 | 0 |
| 480 | chr9:10694484-11014094  | 1 | 1 | 0 | 1 | 0 |
| 481 | chr9:11611157-12063771  | 1 | 1 | 1 | 1 | 0 |
| 482 | chr9:13345206-13426806  | 1 | 1 | 0 | 1 | 0 |
| 483 | chr9:13448777-13516710  | 1 | 1 | 1 | 1 | 0 |
| 484 | chr9:15703271-15718520  | 0 | 0 | 0 | 1 | 0 |
| 485 | chr9:17655236-17673443  | 0 | 1 | 0 | 1 | 0 |
| 486 | chr9:19761852-21600512  | 1 | 1 | 1 | 1 | 0 |
| 487 | chr9:22410910-22432607  | 0 | 1 | 0 | 0 | 0 |
| 488 | chr9:22573547-22589779  | 0 | 0 | 0 | 1 | 0 |
| 489 | chr9:23160606-23224386  | 1 | 1 | 0 | 1 | 0 |
| 490 | chr9:24814531-24893355  | 1 | 1 | 0 | 1 | 0 |
| 491 | chr9:26725593-26745085  | 0 | 0 | 0 | 1 | 0 |
| 492 | chr9:26948549-26972072  | 0 | 0 | 0 | 1 | 0 |
| 493 | chr9:28436048-28452307  | 0 | 0 | 0 | 1 | 0 |
| 494 | chr9:34877130-34922451  | 1 | 1 | 0 | 1 | 0 |
| 495 | chr9:36149125-36169736  | 0 | 0 | 0 | 1 | 0 |
| 496 | chr9:42296347-42323187  | 0 | 1 | 0 | 1 | 0 |
| 497 | chr9:42565268-42582619  | 0 | 0 | 0 | 1 | 0 |
| 498 | chr9:43481097-43495939  | 0 | 0 | 0 | 1 | 0 |
| 499 | chr9:45917465-45931464  | 0 | 1 | 0 | 0 | 0 |
| 500 | chr9:49450214-49465381  | 0 | 0 | 0 | 1 | 0 |
| 501 | chr9:50567380-50584664  | 0 | 0 | 0 | 1 | 0 |
| 502 | chr9:50630089-50657754  | 1 | 1 | 0 | 1 | 0 |
| 503 | chr9:53097716-53112956  | 0 | 0 | 0 | 1 | 0 |
| 504 | chr9:53167014-53181252  | 0 | 0 | 0 | 1 | 0 |
| 505 | chr9:55675258-55813750  | 0 | 1 | 0 | 0 | 0 |
| 506 | chr9:56138796-56153916  | 0 | 0 | 0 | 1 | 0 |
| 507 | chr10:5522341-5537592   | 0 | 0 | 0 | 1 | 0 |
| 508 | chr10:10830201-10862214 | 0 | 1 | 0 | 1 | 0 |
| 509 | chr10:11051139-11071801 | 0 | 0 | 0 | 1 | 0 |
| 510 | chr10:15199028-15253891 | 0 | 0 | 1 | 0 | 0 |
| 511 | chr10:17046674-17066136 | 0 | 0 | 0 | 1 | 0 |
| 512 | chr10:17399981-17426802 | 0 | 0 | 0 | 1 | 0 |
| 513 | chr10:17445168-17465603 | 0 | 0 | 0 | 1 | 0 |
| 514 | chr10:19059933-19096725 | 1 | 0 | 0 | 0 | 0 |
| 515 | chr10:19139391-19159541 | 1 | 0 | 0 | 0 | 0 |
| 516 | chr10:19179667-19220027 | 1 | 0 | 0 | 1 | 0 |
| 517 | chr10:19483878-19534648 | 1 | 0 | 0 | 0 | 0 |

|     |                         |   |   |   |   |   |
|-----|-------------------------|---|---|---|---|---|
| 518 | chr10:20435388-20453974 | 0 | 1 | 0 | 1 | 0 |
| 519 | chr10:21122973-21137085 | 0 | 0 | 0 | 1 | 0 |
| 520 | chr10:21635984-21653215 | 0 | 0 | 0 | 1 | 0 |
| 521 | chr10:25453530-25475116 | 0 | 1 | 0 | 0 | 0 |
| 522 | chr10:25950619-26031202 | 1 | 1 | 1 | 1 | 0 |
| 523 | chr10:26446802-26470529 | 0 | 0 | 0 | 1 | 0 |
| 524 | chr10:28403891-28419153 | 0 | 0 | 0 | 1 | 0 |
| 525 | chr10:28975544-28999462 | 1 | 1 | 0 | 1 | 0 |
| 526 | chr10:29540980-29568081 | 0 | 1 | 0 | 1 | 0 |
| 527 | chr10:29802128-29821750 | 0 | 0 | 0 | 1 | 0 |
| 528 | chr10:30742008-30760215 | 0 | 0 | 0 | 1 | 0 |
| 529 | chr10:33343228-33367822 | 0 | 1 | 0 | 1 | 0 |
| 530 | chr10:33488562-33504404 | 0 | 0 | 0 | 1 | 0 |
| 531 | chr10:34462549-34480912 | 0 | 0 | 0 | 1 | 0 |
| 532 | chr10:34675935-34692300 | 0 | 1 | 0 | 1 | 0 |
| 533 | chr10:35268124-35282378 | 0 | 0 | 0 | 1 | 0 |
| 534 | chr10:36269351-36285655 | 0 | 0 | 0 | 1 | 0 |
| 535 | chr10:37195519-37211331 | 0 | 1 | 0 | 1 | 0 |
| 536 | chr10:37590303-37605598 | 0 | 0 | 0 | 1 | 0 |
| 537 | chr10:39637557-39706499 | 0 | 1 | 0 | 1 | 0 |
| 538 | chr10:40243347-40265718 | 0 | 0 | 0 | 1 | 0 |
| 539 | chr10:40296687-40313110 | 0 | 0 | 0 | 1 | 0 |
| 540 | chr10:40376773-40390922 | 0 | 0 | 0 | 1 | 0 |
| 541 | chr10:41134054-41150213 | 0 | 0 | 0 | 1 | 0 |
| 542 | chr10:43546619-43561133 | 0 | 0 | 0 | 1 | 0 |
| 543 | chr10:45845619-45898441 | 0 | 1 | 1 | 1 | 0 |
| 544 | chr10:46025367-46039601 | 0 | 0 | 0 | 1 | 0 |
| 545 | chr10:46418617-46437091 | 0 | 0 | 0 | 1 | 0 |
| 546 | chr10:50517100-50536671 | 0 | 0 | 0 | 1 | 0 |
| 547 | chr10:50561253-50575523 | 0 | 0 | 0 | 1 | 0 |
| 548 | chr10:50588624-50606037 | 0 | 0 | 0 | 1 | 0 |
| 549 | chr10:51714948-51733505 | 0 | 0 | 0 | 1 | 0 |
| 550 | chr10:53557934-53574181 | 0 | 0 | 0 | 1 | 0 |
| 551 | chr10:53637846-53652226 | 0 | 0 | 0 | 1 | 0 |
| 552 | chr10:53814693-53832051 | 0 | 0 | 0 | 1 | 0 |
| 553 | chr10:53951235-53969660 | 0 | 0 | 0 | 1 | 0 |
| 554 | chr10:55031600-55047873 | 0 | 0 | 0 | 1 | 0 |
| 555 | chr10:55648574-55664878 | 0 | 0 | 0 | 1 | 0 |
| 556 | chr10:56841578-56914302 | 0 | 0 | 1 | 0 | 0 |
| 557 | chr10:61234000-61334000 | 0 | 0 | 0 | 0 | 1 |
| 558 | chr10:63020282-63038882 | 0 | 0 | 0 | 1 | 0 |
| 559 | chr10:63827738-63846276 | 0 | 0 | 0 | 1 | 0 |
| 560 | chr10:64387163-64405477 | 0 | 0 | 0 | 1 | 0 |
| 561 | chr10:64732797-64749013 | 0 | 0 | 0 | 1 | 0 |
| 562 | chr10:67107013-67122141 | 0 | 0 | 0 | 1 | 0 |
| 563 | chr10:67524976-67542293 | 0 | 0 | 0 | 1 | 0 |
| 564 | chr10:69021050-69037280 | 0 | 0 | 0 | 1 | 0 |
| 565 | chr10:69849652-69868047 | 0 | 0 | 0 | 1 | 0 |
| 566 | chr10:70803175-70832339 | 0 | 0 | 0 | 1 | 0 |
| 567 | chr10:70900443-70915623 | 0 | 0 | 0 | 1 | 0 |
| 568 | chr10:70976272-70993645 | 0 | 0 | 0 | 1 | 0 |
| 569 | chr10:71117436-71136791 | 0 | 0 | 0 | 1 | 0 |

|     |                         |   |   |   |   |   |
|-----|-------------------------|---|---|---|---|---|
| 570 | chr11:3063984-3104918   | 0 | 0 | 0 | 1 | 0 |
| 571 | chr11:12160840-12376453 | 1 | 0 | 0 | 0 | 0 |
| 572 | chr11:12484835-12611952 | 1 | 0 | 0 | 1 | 0 |
| 573 | chr11:13930449-13993752 | 1 | 0 | 0 | 1 | 0 |
| 574 | chr11:14064249-14443644 | 1 | 1 | 1 | 1 | 0 |
| 575 | chr11:16354840-16370952 | 0 | 0 | 0 | 1 | 0 |
| 576 | chr11:19093654-19108952 | 0 | 0 | 0 | 1 | 0 |
| 577 | chr11:22257305-22272695 | 0 | 0 | 0 | 1 | 0 |
| 578 | chr11:24881727-24900350 | 0 | 0 | 0 | 1 | 0 |
| 579 | chr11:25268925-25288307 | 0 | 0 | 0 | 1 | 0 |
| 580 | chr11:26938810-26964723 | 0 | 0 | 0 | 1 | 0 |
| 581 | chr11:27230651-27244977 | 0 | 0 | 0 | 1 | 0 |
| 582 | chr11:33886256-33901654 | 0 | 0 | 0 | 1 | 0 |
| 583 | chr11:36424378-36438457 | 0 | 0 | 0 | 1 | 0 |
| 584 | chr11:39973597-39988785 | 0 | 1 | 0 | 1 | 0 |
| 585 | chr11:43753544-43803409 | 1 | 1 | 0 | 1 | 0 |
| 586 | chr11:45612013-45634591 | 0 | 1 | 0 | 1 | 0 |
| 587 | chr11:47379218-47394414 | 0 | 0 | 0 | 1 | 0 |
| 588 | chr11:53364658-53378820 | 0 | 0 | 0 | 1 | 0 |
| 589 | chr11:55472168-55492340 | 1 | 0 | 0 | 1 | 0 |
| 590 | chr11:55656307-55675960 | 0 | 0 | 0 | 1 | 0 |
| 591 | chr11:57650420-57666833 | 0 | 0 | 0 | 1 | 0 |
| 592 | chr11:57906656-57924061 | 0 | 0 | 0 | 1 | 0 |
| 593 | chr11:62316745-62331873 | 0 | 0 | 0 | 1 | 0 |
| 594 | chr11:62743768-62757813 | 0 | 0 | 0 | 1 | 0 |
| 595 | chr11:63820161-63840631 | 0 | 0 | 0 | 1 | 0 |
| 596 | chr11:63940857-63959398 | 0 | 0 | 0 | 1 | 0 |
| 597 | chr11:66016896-66039478 | 0 | 0 | 0 | 1 | 0 |
| 598 | chr11:67014103-67028377 | 0 | 0 | 0 | 1 | 0 |
| 599 | chr11:67860649-67879920 | 0 | 0 | 0 | 1 | 0 |
| 600 | chr11:68219704-68240329 | 0 | 0 | 0 | 1 | 0 |
| 601 | chr11:69716370-69735927 | 0 | 0 | 0 | 1 | 0 |
| 602 | chr11:70316818-70339414 | 0 | 0 | 0 | 1 | 0 |
| 603 | chr11:70735562-70754292 | 0 | 0 | 0 | 1 | 0 |
| 604 | chr11:70878576-70907366 | 0 | 0 | 0 | 1 | 0 |
| 605 | chr11:71359701-71376900 | 0 | 0 | 0 | 1 | 0 |
| 606 | chr11:71573693-71595373 | 0 | 0 | 0 | 1 | 0 |
| 607 | chr11:71635834-71650918 | 0 | 0 | 0 | 1 | 0 |
| 608 | chr11:71851566-71872089 | 0 | 1 | 0 | 1 | 0 |
| 609 | chr11:72047437-72067182 | 0 | 0 | 0 | 1 | 0 |
| 610 | chr11:72106551-72137605 | 0 | 0 | 0 | 1 | 0 |
| 611 | chr11:72522881-72541357 | 0 | 0 | 0 | 1 | 0 |
| 612 | chr11:73789092-73804297 | 0 | 0 | 0 | 1 | 0 |
| 613 | chr11:74035935-74052104 | 0 | 0 | 0 | 1 | 0 |
| 614 | chr11:74069470-74084693 | 0 | 0 | 0 | 1 | 0 |
| 615 | chr11:75101128-75116406 | 0 | 0 | 0 | 1 | 0 |
| 616 | chr11:75683298-75702882 | 0 | 0 | 0 | 1 | 0 |
| 617 | chr11:75727311-75744728 | 0 | 0 | 0 | 1 | 0 |
| 618 | chr11:76397260-76414607 | 0 | 0 | 0 | 1 | 0 |
| 619 | chr11:76488847-76517182 | 0 | 0 | 0 | 1 | 0 |
| 620 | chr11:76524975-76564395 | 0 | 0 | 0 | 1 | 0 |
| 621 | chr11:76600828-76615150 | 0 | 0 | 0 | 1 | 0 |

|     |                         |   |   |   |   |   |
|-----|-------------------------|---|---|---|---|---|
| 622 | chr12:2998761-3027097   | 1 | 0 | 0 | 0 | 0 |
| 623 | chr12:3594274-3915665   | 0 | 1 | 0 | 1 | 0 |
| 624 | chr12:4468564-4614485   | 0 | 1 | 0 | 0 | 0 |
| 625 | chr12:4692766-4719305   | 0 | 0 | 0 | 1 | 0 |
| 626 | chr12:4735158-4811076   | 0 | 1 | 0 | 1 | 0 |
| 627 | chr12:4834273-4866587   | 0 | 1 | 0 | 1 | 0 |
| 628 | chr12:5189712-5218750   | 0 | 0 | 0 | 1 | 0 |
| 629 | chr12:5427601-5444889   | 0 | 0 | 0 | 1 | 0 |
| 630 | chr12:6325907-6342036   | 0 | 0 | 0 | 1 | 0 |
| 631 | chr12:6450697-6466008   | 0 | 0 | 0 | 1 | 0 |
| 632 | chr12:6788598-6806943   | 0 | 0 | 0 | 1 | 0 |
| 633 | chr12:6838006-6854251   | 0 | 0 | 0 | 1 | 0 |
| 634 | chr12:8914350-8929731   | 0 | 0 | 0 | 1 | 0 |
| 635 | chr12:9229489-9244700   | 0 | 0 | 0 | 1 | 0 |
| 636 | chr12:10555998-10570064 | 0 | 0 | 0 | 1 | 0 |
| 637 | chr12:11044944-11063199 | 0 | 0 | 0 | 1 | 0 |
| 638 | chr12:12582455-12597916 | 0 | 0 | 0 | 1 | 0 |
| 639 | chr12:13200136-13216606 | 0 | 0 | 0 | 1 | 0 |
| 640 | chr12:13459063-13484640 | 0 | 0 | 0 | 1 | 0 |
| 641 | chr12:15662351-15693720 | 0 | 0 | 0 | 1 | 0 |
| 642 | chr12:16919467-16938946 | 0 | 0 | 0 | 1 | 0 |
| 643 | chr12:17489849-17510344 | 0 | 0 | 0 | 1 | 0 |
| 644 | chr12:17940596-17958843 | 0 | 0 | 0 | 1 | 0 |
| 645 | chr12:18308852-18328618 | 0 | 0 | 0 | 1 | 0 |
| 646 | chr12:20523164-20544952 | 0 | 0 | 0 | 1 | 0 |
| 647 | chr12:20673274-20694736 | 0 | 0 | 0 | 1 | 0 |
| 648 | chr12:22065611-22080901 | 0 | 0 | 0 | 1 | 0 |
| 649 | chr12:23683061-23698250 | 0 | 0 | 0 | 1 | 0 |
| 650 | chr12:24544343-24558507 | 0 | 0 | 0 | 1 | 0 |
| 651 | chr12:27348088-27363442 | 0 | 0 | 0 | 1 | 0 |
| 652 | chr12:29735906-29752167 | 0 | 0 | 0 | 1 | 0 |
| 653 | chr12:33750165-33781129 | 0 | 1 | 0 | 1 | 0 |
| 654 | chr12:34419805-34453853 | 0 | 1 | 0 | 1 | 0 |
| 655 | chr12:35340449-35357768 | 0 | 0 | 0 | 1 | 0 |
| 656 | chr12:37864640-37878604 | 0 | 0 | 0 | 1 | 0 |
| 657 | chr12:38492580-38508717 | 0 | 1 | 0 | 1 | 0 |
| 658 | chr12:41069953-41089411 | 0 | 0 | 0 | 1 | 0 |
| 659 | chr12:47649372-47664633 | 0 | 0 | 0 | 1 | 0 |
| 660 | chr12:49436625-49450759 | 0 | 0 | 0 | 1 | 0 |
| 661 | chr12:50123379-50223379 | 0 | 0 | 0 | 0 | 1 |
| 662 | chr12:57039181-57067335 | 1 | 1 | 0 | 1 | 0 |
| 663 | chr12:57728047-57746353 | 0 | 0 | 0 | 1 | 0 |
| 664 | chr12:59523796-59538847 | 0 | 0 | 0 | 1 | 0 |
| 665 | chr12:60092319-60118042 | 0 | 0 | 0 | 1 | 0 |
| 666 | chr12:62342308-62365953 | 0 | 1 | 0 | 1 | 0 |
| 667 | chr12:65347347-65361702 | 0 | 0 | 0 | 1 | 0 |
| 668 | chr12:65623047-65642397 | 0 | 0 | 0 | 1 | 0 |
| 669 | chr12:65889208-65906716 | 0 | 0 | 0 | 1 | 0 |
| 670 | chr12:66086771-66106496 | 0 | 0 | 0 | 1 | 0 |
| 671 | chr12:66180384-66198764 | 0 | 0 | 0 | 1 | 0 |
| 672 | chr12:71762312-71776576 | 0 | 0 | 0 | 1 | 0 |
| 673 | chr12:72036716-72052024 | 0 | 0 | 0 | 1 | 0 |

|     |                         |   |   |   |   |   |
|-----|-------------------------|---|---|---|---|---|
| 674 | chr12:73006997-73023143 | 0 | 0 | 0 | 1 | 0 |
| 675 | chr12:73433236-73453552 | 0 | 0 | 0 | 1 | 0 |
| 676 | chr12:73789217-73807793 | 0 | 0 | 0 | 1 | 0 |
| 677 | chr12:74648851-74662973 | 0 | 0 | 0 | 1 | 0 |
| 678 | chr12:74922607-74938779 | 0 | 0 | 0 | 1 | 0 |
| 679 | chr13:5455648-5503485   | 0 | 1 | 0 | 1 | 0 |
| 680 | chr13:8071422-8088672   | 0 | 1 | 0 | 1 | 0 |
| 681 | chr13:8898294-8915552   | 0 | 0 | 0 | 1 | 0 |
| 682 | chr13:12566678-12639288 | 0 | 0 | 1 | 0 | 0 |
| 683 | chr13:14506047-14532119 | 0 | 1 | 0 | 1 | 0 |
| 684 | chr13:14839999-14855302 | 0 | 0 | 0 | 1 | 0 |
| 685 | chr13:15735299-15755603 | 0 | 0 | 0 | 1 | 0 |
| 686 | chr13:16413460-16431921 | 0 | 0 | 0 | 1 | 0 |
| 687 | chr13:19101042-19123224 | 1 | 0 | 0 | 0 | 0 |
| 688 | chr13:19575740-19591292 | 0 | 0 | 0 | 1 | 0 |
| 689 | chr13:20899778-20922374 | 0 | 0 | 0 | 1 | 0 |
| 690 | chr13:26240747-26269093 | 0 | 0 | 0 | 1 | 0 |
| 691 | chr13:27303424-27319653 | 0 | 0 | 0 | 1 | 0 |
| 692 | chr13:31480469-31569361 | 0 | 1 | 0 | 1 | 0 |
| 693 | chr13:32002120-32017530 | 0 | 0 | 0 | 1 | 0 |
| 694 | chr13:34114916-34134555 | 0 | 1 | 0 | 1 | 0 |
| 695 | chr13:36415919-36436405 | 0 | 0 | 0 | 1 | 0 |
| 696 | chr13:41493322-41510685 | 0 | 0 | 0 | 1 | 0 |
| 697 | chr13:42177603-42230449 | 0 | 0 | 0 | 1 | 0 |
| 698 | chr13:42315151-42338869 | 0 | 0 | 0 | 1 | 0 |
| 699 | chr13:42439674-42455900 | 0 | 0 | 0 | 1 | 0 |
| 700 | chr13:42504578-42527292 | 0 | 0 | 0 | 1 | 0 |
| 701 | chr13:42741948-42759134 | 0 | 0 | 0 | 1 | 0 |
| 702 | chr13:42904811-42923169 | 0 | 0 | 0 | 1 | 0 |
| 703 | chr13:43286427-43314595 | 1 | 0 | 0 | 1 | 0 |
| 704 | chr13:43329154-43347615 | 0 | 0 | 0 | 1 | 0 |
| 705 | chr13:43835334-43852766 | 0 | 1 | 0 | 1 | 0 |
| 706 | chr13:44161128-44181587 | 0 | 1 | 0 | 1 | 0 |
| 707 | chr13:44267492-44283777 | 0 | 0 | 0 | 1 | 0 |
| 708 | chr13:46420046-46441532 | 0 | 0 | 0 | 1 | 0 |
| 709 | chr13:46852286-46867429 | 0 | 0 | 0 | 1 | 0 |
| 710 | chr13:48243134-48260594 | 0 | 0 | 0 | 1 | 0 |
| 711 | chr13:48290362-48304649 | 0 | 0 | 0 | 1 | 0 |
| 712 | chr13:48829830-48847318 | 0 | 0 | 0 | 1 | 0 |
| 713 | chr13:49917606-49934974 | 0 | 0 | 0 | 1 | 0 |
| 714 | chr13:51757506-51775552 | 0 | 0 | 0 | 1 | 0 |
| 715 | chr13:51981267-52081267 | 0 | 0 | 0 | 0 | 1 |
| 716 | chr13:56412193-56427554 | 0 | 1 | 0 | 1 | 0 |
| 717 | chr13:61250653-61273311 | 0 | 0 | 0 | 1 | 0 |
| 718 | chr13:61586326-61603713 | 0 | 0 | 0 | 1 | 0 |
| 719 | chr13:61624131-61639463 | 0 | 0 | 0 | 1 | 0 |
| 720 | chr13:61821098-61985322 | 1 | 1 | 0 | 1 | 0 |
| 721 | chr13:62425790-62469200 | 1 | 1 | 0 | 1 | 0 |
| 722 | chr13:62674291-62693866 | 0 | 1 | 0 | 1 | 0 |
| 723 | chr13:62729594-62753659 | 1 | 0 | 0 | 1 | 0 |
| 724 | chr13:63918184-63941647 | 0 | 1 | 0 | 1 | 0 |
| 725 | chr13:64984658-65007227 | 0 | 0 | 0 | 1 | 0 |

|     |                         |   |   |   |   |   |
|-----|-------------------------|---|---|---|---|---|
| 726 | chr13:65686454-65732925 | 0 | 1 | 0 | 1 | 0 |
| 727 | chr13:65887343-65905405 | 0 | 1 | 0 | 1 | 0 |
| 728 | chr13:66063252-66182471 | 1 | 1 | 0 | 0 | 0 |
| 729 | chr14:3016565-3327175   | 1 | 1 | 0 | 1 | 0 |
| 730 | chr14:3460140-3488090   | 1 | 1 | 0 | 1 | 0 |
| 731 | chr14:3665963-3706365   | 1 | 1 | 0 | 1 | 0 |
| 732 | chr14:5273707-5823919   | 1 | 1 | 1 | 1 | 0 |
| 733 | chr14:8476812-8491867   | 0 | 0 | 0 | 1 | 0 |
| 734 | chr14:8531465-8549051   | 0 | 0 | 0 | 1 | 0 |
| 735 | chr14:8709489-8724657   | 0 | 0 | 0 | 1 | 0 |
| 736 | chr14:10799499-10818873 | 0 | 0 | 0 | 1 | 0 |
| 737 | chr14:14122762-14139226 | 0 | 0 | 0 | 1 | 0 |
| 738 | chr14:14509512-14525773 | 0 | 0 | 0 | 1 | 0 |
| 739 | chr14:14569225-14616196 | 1 | 0 | 0 | 0 | 0 |
| 740 | chr14:15526244-15544727 | 0 | 1 | 0 | 1 | 0 |
| 741 | chr14:16340303-16355666 | 0 | 0 | 0 | 1 | 0 |
| 742 | chr14:17428677-17443984 | 0 | 0 | 0 | 1 | 0 |
| 743 | chr14:20439399-20461882 | 1 | 0 | 0 | 0 | 0 |
| 744 | chr14:20982955-21002416 | 0 | 0 | 0 | 1 | 0 |
| 745 | chr14:22148795-22163977 | 0 | 0 | 0 | 1 | 0 |
| 746 | chr14:25259200-25280525 | 1 | 0 | 0 | 1 | 0 |
| 747 | chr14:27027973-27070609 | 0 | 1 | 0 | 1 | 0 |
| 748 | chr14:30019405-30035608 | 0 | 0 | 0 | 1 | 0 |
| 749 | chr14:34812466-34829674 | 0 | 0 | 0 | 1 | 0 |
| 750 | chr14:38246860-38269642 | 0 | 0 | 0 | 1 | 0 |
| 751 | chr14:42508042-42608042 | 0 | 0 | 0 | 0 | 1 |
| 752 | chr14:42688427-42705654 | 0 | 0 | 0 | 1 | 0 |
| 753 | chr14:42931102-42946298 | 0 | 0 | 0 | 1 | 0 |
| 754 | chr14:45978298-46140677 | 0 | 0 | 1 | 0 | 0 |
| 755 | chr14:46157541-46179001 | 0 | 0 | 0 | 1 | 0 |
| 756 | chr14:46518753-46532998 | 0 | 0 | 0 | 1 | 0 |
| 757 | chr14:47173838-47191312 | 0 | 0 | 0 | 1 | 0 |
| 758 | chr14:47953162-48154923 | 1 | 1 | 0 | 1 | 0 |
| 759 | chr14:49709883-49729376 | 0 | 0 | 0 | 1 | 0 |
| 760 | chr14:50563807-50590240 | 0 | 0 | 0 | 1 | 0 |
| 761 | chr14:52421613-52440045 | 0 | 0 | 0 | 1 | 0 |
| 762 | chr14:53307016-53321352 | 0 | 0 | 0 | 1 | 0 |
| 763 | chr14:54425711-54442184 | 0 | 0 | 0 | 1 | 0 |
| 764 | chr14:54678271-54778271 | 0 | 0 | 0 | 0 | 1 |
| 765 | chr14:55170722-55187160 | 0 | 0 | 0 | 1 | 0 |
| 766 | chr14:55220363-55265128 | 0 | 1 | 0 | 1 | 0 |
| 767 | chr14:55300887-55317061 | 0 | 0 | 0 | 1 | 0 |
| 768 | chr14:57351859-57376567 | 0 | 1 | 0 | 1 | 0 |
| 769 | chr14:58854485-58872669 | 0 | 0 | 0 | 1 | 0 |
| 770 | chr14:59943579-59957687 | 0 | 0 | 0 | 1 | 0 |
| 771 | chr14:60667163-60685655 | 0 | 0 | 0 | 1 | 0 |
| 772 | chr14:60873455-61220668 | 0 | 1 | 1 | 1 | 0 |
| 773 | chr14:61269056-61322155 | 1 | 0 | 0 | 0 | 0 |
| 774 | chr14:62294457-62315626 | 0 | 0 | 0 | 1 | 0 |
| 775 | chr14:62450938-62466187 | 0 | 0 | 0 | 1 | 0 |
| 776 | chr14:62792883-62807257 | 0 | 0 | 0 | 1 | 0 |
| 777 | chr14:63056845-63081444 | 0 | 0 | 0 | 1 | 0 |

|     |                         |   |   |   |   |   |
|-----|-------------------------|---|---|---|---|---|
| 778 | chr14:63383098-63413032 | 0 | 0 | 0 | 1 | 0 |
| 779 | chr14:63706605-63724252 | 0 | 0 | 0 | 1 | 0 |
| 780 | chr15:3037952-3064622   | 1 | 0 | 0 | 0 | 0 |
| 781 | chr15:3120718-3143191   | 1 | 0 | 0 | 0 | 0 |
| 782 | chr15:3180301-3199098   | 1 | 0 | 0 | 0 | 0 |
| 783 | chr15:3208083-3232669   | 1 | 0 | 0 | 1 | 0 |
| 784 | chr15:5974257-5989500   | 0 | 1 | 0 | 1 | 0 |
| 785 | chr15:6129733-6151188   | 0 | 1 | 0 | 1 | 0 |
| 786 | chr15:7048601-7072026   | 0 | 1 | 0 | 1 | 0 |
| 787 | chr15:7362565-7379088   | 0 | 0 | 0 | 1 | 0 |
| 788 | chr15:7402705-7417142   | 0 | 0 | 0 | 1 | 0 |
| 789 | chr15:10117879-10139795 | 0 | 0 | 0 | 1 | 0 |
| 790 | chr15:12880632-12897101 | 0 | 0 | 0 | 1 | 0 |
| 791 | chr15:13151457-13174206 | 0 | 1 | 0 | 1 | 0 |
| 792 | chr15:15436628-15451960 | 0 | 0 | 0 | 1 | 0 |
| 793 | chr15:15641261-15658720 | 0 | 0 | 0 | 1 | 0 |
| 794 | chr15:16577102-16672475 | 0 | 0 | 1 | 0 | 0 |
| 795 | chr15:17813862-17830431 | 0 | 0 | 0 | 1 | 0 |
| 796 | chr15:18514561-18536131 | 0 | 0 | 0 | 1 | 0 |
| 797 | chr15:20159880-20227982 | 1 | 1 | 0 | 1 | 0 |
| 798 | chr15:27641959-27669745 | 0 | 1 | 0 | 1 | 0 |
| 799 | chr15:29307780-29322941 | 0 | 0 | 0 | 1 | 0 |
| 800 | chr15:31503428-31535844 | 0 | 1 | 1 | 1 | 0 |
| 801 | chr15:31773897-31790275 | 0 | 1 | 0 | 1 | 0 |
| 802 | chr15:32826968-32851381 | 1 | 1 | 0 | 1 | 0 |
| 803 | chr15:33009724-33030312 | 0 | 1 | 0 | 1 | 0 |
| 804 | chr15:33220777-33236117 | 0 | 0 | 0 | 1 | 0 |
| 805 | chr15:33520618-33541295 | 0 | 0 | 0 | 1 | 0 |
| 806 | chr15:34277383-34299055 | 0 | 1 | 0 | 1 | 0 |
| 807 | chr15:37328665-37343910 | 0 | 0 | 0 | 1 | 0 |
| 808 | chr15:41168461-41187249 | 0 | 0 | 0 | 1 | 0 |
| 809 | chr15:41504260-41519503 | 0 | 0 | 0 | 1 | 0 |
| 810 | chr15:42918307-42940137 | 0 | 0 | 0 | 1 | 0 |
| 811 | chr15:43242368-43256590 | 0 | 0 | 0 | 1 | 0 |
| 812 | chr15:44601123-44615203 | 0 | 0 | 0 | 1 | 0 |
| 813 | chr15:45063753-45081310 | 0 | 0 | 0 | 1 | 0 |
| 814 | chr15:45253980-45274419 | 0 | 0 | 0 | 1 | 0 |
| 815 | chr15:45668312-45684849 | 0 | 0 | 0 | 1 | 0 |
| 816 | chr15:45724358-45744902 | 0 | 1 | 0 | 1 | 0 |
| 817 | chr15:51674444-51704309 | 0 | 1 | 0 | 1 | 0 |
| 818 | chr15:54281055-54311140 | 0 | 0 | 0 | 1 | 0 |
| 819 | chr15:55681015-55695137 | 0 | 0 | 0 | 1 | 0 |
| 820 | chr15:56331422-56353036 | 0 | 0 | 0 | 1 | 0 |
| 821 | chr15:59032387-59046578 | 0 | 0 | 0 | 1 | 0 |
| 822 | chr15:59933586-59947764 | 0 | 0 | 0 | 1 | 0 |
| 823 | chr15:60547807-60671102 | 0 | 1 | 0 | 0 | 0 |
| 824 | chr15:61001854-61017347 | 0 | 0 | 0 | 1 | 0 |
| 825 | chr15:61029448-61044689 | 0 | 0 | 0 | 1 | 0 |
| 826 | chr15:61109210-61123464 | 0 | 0 | 0 | 1 | 0 |
| 827 | chr15:61728360-61742688 | 0 | 0 | 0 | 1 | 0 |
| 828 | chr15:62719674-62733702 | 0 | 0 | 0 | 1 | 0 |
| 829 | chr15:64209298-64223430 | 0 | 0 | 0 | 1 | 0 |



|     |                         |   |   |   |   |   |
|-----|-------------------------|---|---|---|---|---|
| 830 | chr15:64379505-64401082 | 0 | 0 | 0 | 1 | 0 |
| 831 | chr15:64596338-64611660 | 0 | 0 | 0 | 1 | 0 |
| 832 | chr15:64762271-64781707 | 0 | 0 | 0 | 1 | 0 |
| 833 | chr15:65425993-65520363 | 1 | 0 | 0 | 1 | 0 |
| 834 | chr15:65649595-65736184 | 1 | 0 | 0 | 1 | 0 |
| 835 | chr15:65882438-65901803 | 0 | 0 | 0 | 1 | 0 |
| 836 | chr15:67189170-67209912 | 1 | 0 | 0 | 0 | 0 |
| 837 | chr16:3001293-3071927   | 1 | 0 | 0 | 0 | 0 |
| 838 | chr16:3166749-3195481   | 1 | 0 | 0 | 0 | 0 |
| 839 | chr16:4122072-4142266   | 1 | 0 | 0 | 0 | 0 |
| 840 | chr16:4202763-4360649   | 1 | 1 | 0 | 1 | 0 |
| 841 | chr16:4679713-4712774   | 1 | 0 | 0 | 1 | 0 |
| 842 | chr16:4730203-4756572   | 1 | 0 | 0 | 0 | 0 |
| 843 | chr16:9365410-9383909   | 0 | 0 | 0 | 1 | 0 |
| 844 | chr16:10233028-10259656 | 1 | 0 | 0 | 0 | 0 |
| 845 | chr16:13524829-13580705 | 1 | 0 | 0 | 1 | 0 |
| 846 | chr16:14344651-14359809 | 0 | 0 | 0 | 1 | 0 |
| 847 | chr16:15544211-15559695 | 0 | 0 | 0 | 1 | 0 |
| 848 | chr16:16534455-16558791 | 1 | 0 | 0 | 1 | 0 |
| 849 | chr16:16834495-16927041 | 1 | 1 | 0 | 1 | 0 |
| 850 | chr16:18230097-18249599 | 0 | 1 | 0 | 0 | 0 |
| 851 | chr16:18292496-18307521 | 0 | 0 | 0 | 1 | 0 |
| 852 | chr16:21068208-21087779 | 0 | 1 | 0 | 1 | 0 |
| 853 | chr16:22471210-22487608 | 0 | 0 | 0 | 1 | 0 |
| 854 | chr16:25089646-25103974 | 0 | 0 | 0 | 1 | 0 |
| 855 | chr16:25574342-25588457 | 0 | 0 | 0 | 1 | 0 |
| 856 | chr16:28606576-28629470 | 0 | 0 | 0 | 1 | 0 |
| 857 | chr16:28947049-28962349 | 0 | 1 | 0 | 1 | 0 |
| 858 | chr16:30242453-30258800 | 0 | 0 | 0 | 1 | 0 |
| 859 | chr16:33077118-33097576 | 0 | 0 | 0 | 1 | 0 |
| 860 | chr16:38688303-38706705 | 0 | 0 | 0 | 1 | 0 |
| 861 | chr16:40460886-40480391 | 0 | 1 | 0 | 1 | 0 |
| 862 | chr16:41092083-41109690 | 0 | 0 | 0 | 1 | 0 |
| 863 | chr16:41552146-41576790 | 1 | 0 | 0 | 1 | 0 |
| 864 | chr16:42934901-42957231 | 1 | 1 | 0 | 1 | 0 |
| 865 | chr16:43002825-43029093 | 1 | 0 | 0 | 1 | 0 |
| 866 | chr16:43989826-44005997 | 0 | 0 | 0 | 1 | 0 |
| 867 | chr16:44333540-44370693 | 1 | 0 | 0 | 1 | 0 |
| 868 | chr16:44830600-44849076 | 0 | 0 | 0 | 1 | 0 |
| 869 | chr16:47065227-47081547 | 0 | 0 | 0 | 1 | 0 |
| 870 | chr16:50122428-50136522 | 0 | 0 | 0 | 1 | 0 |
| 871 | chr16:50355013-50372387 | 0 | 0 | 0 | 1 | 0 |
| 872 | chr16:50502370-50527100 | 1 | 0 | 0 | 0 | 0 |
| 873 | chr16:51238729-51252910 | 0 | 0 | 0 | 1 | 0 |
| 874 | chr16:53055429-53076002 | 0 | 0 | 0 | 1 | 0 |
| 875 | chr16:53617086-53808291 | 1 | 1 | 0 | 1 | 0 |
| 876 | chr16:53825039-53857099 | 1 | 1 | 0 | 1 | 0 |
| 877 | chr16:53983726-54004312 | 1 | 0 | 0 | 0 | 0 |
| 878 | chr16:54599783-54628045 | 1 | 0 | 0 | 0 | 0 |
| 879 | chr16:54867570-54886077 | 0 | 0 | 0 | 1 | 0 |
| 880 | chr16:55174699-55194080 | 0 | 0 | 0 | 1 | 0 |
| 881 | chr16:55235004-55253122 | 1 | 0 | 0 | 0 | 0 |

|     |                         |   |   |   |   |   |
|-----|-------------------------|---|---|---|---|---|
| 882 | chr16:56073219-56088264 | 0 | 0 | 0 | 1 | 0 |
| 883 | chr16:56910022-56927337 | 0 | 0 | 0 | 1 | 0 |
| 884 | chr16:56989872-57153933 | 1 | 1 | 0 | 1 | 0 |
| 885 | chr16:57408842-57426588 | 0 | 0 | 0 | 1 | 0 |
| 886 | chr16:57865534-57926159 | 1 | 1 | 0 | 1 | 0 |
| 887 | chr16:58411042-58426287 | 0 | 0 | 0 | 1 | 0 |
| 888 | chr16:58788679-58802788 | 0 | 0 | 0 | 1 | 0 |
| 889 | chr16:58999012-59016171 | 0 | 0 | 0 | 1 | 0 |
| 890 | chr16:59079600-59367624 | 0 | 1 | 1 | 0 | 0 |
| 891 | chr16:59448527-59469072 | 0 | 0 | 0 | 1 | 0 |
| 892 | chr16:59957962-59972217 | 0 | 0 | 0 | 1 | 0 |
| 893 | chr16:60178115-60192315 | 0 | 0 | 0 | 1 | 0 |
| 894 | chr16:60680093-60698616 | 0 | 0 | 0 | 1 | 0 |
| 895 | chr16:60763394-60782896 | 0 | 0 | 0 | 1 | 0 |
| 896 | chr16:61435950-61459453 | 0 | 0 | 0 | 1 | 0 |
| 897 | chr16:61747545-61763607 | 0 | 0 | 0 | 1 | 0 |
| 898 | chr16:61888977-62570175 | 1 | 1 | 1 | 1 | 0 |
| 899 | chr17:2999333-3019356   | 0 | 0 | 0 | 1 | 0 |
| 900 | chr17:7508321-7522486   | 0 | 0 | 0 | 1 | 0 |
| 901 | chr17:7543410-7557469   | 0 | 0 | 0 | 1 | 0 |
| 902 | chr17:12036771-12053066 | 0 | 0 | 0 | 1 | 0 |
| 903 | chr17:14375148-14390373 | 0 | 0 | 0 | 1 | 0 |
| 904 | chr17:14478371-14524100 | 0 | 0 | 0 | 1 | 0 |
| 905 | chr17:14721081-14740565 | 0 | 0 | 0 | 1 | 0 |
| 906 | chr17:16633701-16648142 | 0 | 0 | 0 | 1 | 0 |
| 907 | chr17:16843338-16858484 | 0 | 0 | 0 | 1 | 0 |
| 908 | chr17:17783579-17800802 | 0 | 0 | 0 | 1 | 0 |
| 909 | chr17:19195500-19295500 | 0 | 0 | 0 | 0 | 1 |
| 910 | chr17:24430019-24801805 | 1 | 1 | 0 | 1 | 0 |
| 911 | chr17:27552902-27570077 | 0 | 0 | 0 | 1 | 0 |
| 912 | chr17:28959798-28979156 | 0 | 0 | 0 | 1 | 0 |
| 913 | chr17:29299966-29315191 | 0 | 0 | 0 | 1 | 0 |
| 914 | chr17:37430891-37459953 | 0 | 1 | 0 | 1 | 0 |
| 915 | chr17:40308061-40325334 | 0 | 0 | 0 | 1 | 0 |
| 916 | chr17:40669512-40695807 | 0 | 1 | 0 | 1 | 0 |
| 917 | chr17:40738609-40803594 | 1 | 1 | 0 | 1 | 0 |
| 918 | chr17:42212038-42226244 | 0 | 0 | 0 | 1 | 0 |
| 919 | chr17:42383490-42430052 | 1 | 1 | 0 | 1 | 0 |
| 920 | chr17:42657160-42679688 | 0 | 0 | 0 | 1 | 0 |
| 921 | chr17:43143848-43158953 | 0 | 0 | 0 | 1 | 0 |
| 922 | chr17:43354741-43370032 | 0 | 0 | 0 | 1 | 0 |
| 923 | chr17:43407030-43424401 | 0 | 0 | 0 | 1 | 0 |
| 924 | chr17:44649571-47075941 | 0 | 1 | 1 | 1 | 0 |
| 925 | chr17:48341612-48360038 | 0 | 1 | 0 | 1 | 0 |
| 926 | chr17:55557152-55576708 | 0 | 1 | 0 | 1 | 0 |
| 927 | chr17:56242957-56260422 | 0 | 0 | 0 | 1 | 0 |
| 928 | chr17:57528463-57552116 | 0 | 0 | 0 | 1 | 0 |
| 929 | chr17:57565626-57583155 | 0 | 0 | 0 | 1 | 0 |
| 930 | chr17:59701615-59953467 | 1 | 1 | 1 | 1 | 0 |
| 931 | chr17:60450932-60491108 | 1 | 1 | 0 | 1 | 0 |
| 932 | chr17:60497325-60529106 | 1 | 0 | 0 | 0 | 0 |
| 933 | chr17:60549745-60576685 | 1 | 0 | 0 | 1 | 0 |

|     |                         |   |   |   |   |   |
|-----|-------------------------|---|---|---|---|---|
| 934 | chr17:61959285-61977518 | 0 | 0 | 0 | 1 | 0 |
| 935 | chr17:63112279-63127508 | 0 | 0 | 0 | 1 | 0 |
| 936 | chr17:63762527-63776654 | 0 | 0 | 0 | 1 | 0 |
| 937 | chr17:64662082-64711046 | 1 | 1 | 0 | 1 | 0 |
| 938 | chr17:64871855-64888360 | 0 | 0 | 0 | 1 | 0 |
| 939 | chr17:65109201-65130654 | 0 | 0 | 0 | 1 | 0 |
| 940 | chr17:66305148-66327424 | 0 | 1 | 0 | 1 | 0 |
| 941 | chr17:66488762-66504892 | 0 | 0 | 0 | 1 | 0 |
| 942 | chr18:5569059-5592288   | 1 | 0 | 0 | 1 | 0 |
| 943 | chr18:7724276-7788068   | 0 | 1 | 1 | 1 | 0 |
| 944 | chr18:7926681-7946020   | 0 | 0 | 0 | 1 | 0 |
| 945 | chr18:10528135-10542456 | 0 | 0 | 0 | 1 | 0 |
| 946 | chr18:14022070-14040314 | 0 | 0 | 0 | 1 | 0 |
| 947 | chr18:14241032-14265858 | 1 | 0 | 0 | 0 | 0 |
| 948 | chr18:14298066-14435292 | 1 | 1 | 1 | 1 | 0 |
| 949 | chr18:14481178-14510793 | 1 | 0 | 0 | 0 | 0 |
| 950 | chr18:16703375-16718619 | 0 | 0 | 0 | 1 | 0 |
| 951 | chr18:21338918-21835839 | 1 | 1 | 1 | 1 | 0 |
| 952 | chr18:22159071-22189060 | 1 | 0 | 0 | 0 | 0 |
| 953 | chr18:23355987-23370142 | 0 | 0 | 0 | 1 | 0 |
| 954 | chr18:27162829-27182129 | 0 | 0 | 0 | 1 | 0 |
| 955 | chr18:27884659-27903558 | 0 | 0 | 0 | 1 | 0 |
| 956 | chr18:28060794-28081053 | 0 | 0 | 0 | 1 | 0 |
| 957 | chr18:28301691-28324899 | 1 | 0 | 0 | 0 | 0 |
| 958 | chr18:28442219-28462365 | 1 | 0 | 0 | 0 | 0 |
| 959 | chr18:30261998-30282714 | 0 | 0 | 0 | 1 | 0 |
| 960 | chr18:31181738-31195964 | 0 | 0 | 0 | 1 | 0 |
| 961 | chr18:31476527-31493717 | 0 | 1 | 0 | 1 | 0 |
| 962 | chr18:31996550-32010783 | 0 | 0 | 0 | 1 | 0 |
| 963 | chr18:33245026-33285097 | 1 | 0 | 0 | 0 | 0 |
| 964 | chr18:34889733-34904805 | 0 | 0 | 0 | 1 | 0 |
| 965 | chr18:35033590-35047709 | 0 | 0 | 0 | 1 | 0 |
| 966 | chr18:36025667-36042040 | 0 | 0 | 0 | 1 | 0 |
| 967 | chr18:40405081-40490177 | 1 | 0 | 0 | 1 | 0 |
| 968 | chr18:41730760-41770613 | 0 | 1 | 0 | 0 | 0 |
| 969 | chr18:41942338-41958593 | 0 | 0 | 0 | 1 | 0 |
| 970 | chr18:42333258-42397202 | 1 | 0 | 0 | 0 | 0 |
| 971 | chr18:42635684-42671820 | 0 | 1 | 0 | 1 | 0 |
| 972 | chr18:43137502-43154921 | 0 | 0 | 0 | 1 | 0 |
| 973 | chr18:43326509-43529058 | 1 | 1 | 0 | 1 | 0 |
| 974 | chr18:43645438-43661468 | 0 | 1 | 0 | 1 | 0 |
| 975 | chr18:43720707-43997014 | 1 | 1 | 0 | 1 | 0 |
| 976 | chr18:44198785-44403557 | 1 | 1 | 0 | 1 | 0 |
| 977 | chr18:45088326-45105806 | 0 | 0 | 0 | 1 | 0 |
| 978 | chr18:47353084-47368492 | 0 | 0 | 0 | 1 | 0 |
| 979 | chr18:47825751-47841046 | 0 | 0 | 0 | 1 | 0 |
| 980 | chr18:48551883-48573253 | 0 | 0 | 0 | 1 | 0 |
| 981 | chr18:49150749-49165028 | 0 | 0 | 0 | 1 | 0 |
| 982 | chr18:49323954-49339109 | 0 | 0 | 0 | 1 | 0 |
| 983 | chr18:50839157-50855488 | 0 | 0 | 0 | 1 | 0 |
| 984 | chr18:50919047-50936291 | 0 | 0 | 0 | 1 | 0 |
| 985 | chr18:50961954-50977153 | 0 | 0 | 0 | 1 | 0 |

|      |                         |   |   |   |   |   |
|------|-------------------------|---|---|---|---|---|
| 986  | chr18:52096032-52181816 | 1 | 1 | 0 | 1 | 0 |
| 987  | chr18:52852471-52869671 | 0 | 0 | 0 | 1 | 0 |
| 988  | chr18:52915458-52930555 | 0 | 1 | 0 | 1 | 0 |
| 989  | chr18:53186160-53205517 | 0 | 0 | 0 | 1 | 0 |
| 990  | chr18:54236934-54257648 | 0 | 0 | 0 | 1 | 0 |
| 991  | chr18:54363670-54378968 | 0 | 0 | 0 | 1 | 0 |
| 992  | chr18:54483634-54502051 | 0 | 0 | 0 | 1 | 0 |
| 993  | chr18:54568631-54713153 | 0 | 1 | 0 | 0 | 0 |
| 994  | chr18:56851100-56870510 | 0 | 0 | 0 | 1 | 0 |
| 995  | chr18:56904881-56922003 | 0 | 0 | 0 | 1 | 0 |
| 996  | chr18:57091278-57106857 | 0 | 0 | 0 | 1 | 0 |
| 997  | chr18:57291663-57437148 | 1 | 1 | 0 | 1 | 0 |
| 998  | chr18:57529789-57547000 | 0 | 0 | 0 | 1 | 0 |
| 999  | chr18:57686098-57715650 | 1 | 1 | 0 | 1 | 0 |
| 1000 | chr18:58778305-58872314 | 1 | 0 | 0 | 1 | 0 |
| 1001 | chr19:4713580-4753215   | 0 | 1 | 0 | 1 | 0 |
| 1002 | chr19:7133652-7150126   | 0 | 0 | 0 | 1 | 0 |
| 1003 | chr19:7460153-7478628   | 0 | 0 | 0 | 1 | 0 |
| 1004 | chr19:7815104-7834508   | 0 | 0 | 0 | 1 | 0 |
| 1005 | chr19:8981201-9000530   | 0 | 0 | 0 | 1 | 0 |
| 1006 | chr19:9706001-9728916   | 1 | 0 | 0 | 0 | 0 |
| 1007 | chr19:10186912-10207641 | 0 | 0 | 0 | 1 | 0 |
| 1008 | chr19:10899196-10914306 | 0 | 0 | 0 | 1 | 0 |
| 1009 | chr19:22212031-22235939 | 1 | 0 | 0 | 1 | 0 |
| 1010 | chr19:22303497-22329887 | 1 | 0 | 0 | 0 | 0 |
| 1011 | chr19:22400293-22510098 | 1 | 1 | 0 | 1 | 0 |
| 1012 | chr19:22728152-22762251 | 0 | 1 | 0 | 1 | 0 |
| 1013 | chr19:22835008-23349051 | 1 | 1 | 1 | 1 | 0 |
| 1014 | chr19:23452477-23468869 | 0 | 0 | 0 | 1 | 0 |
| 1015 | chr19:24154238-24175158 | 0 | 1 | 0 | 1 | 0 |
| 1016 | chr19:24438882-24482427 | 1 | 0 | 0 | 1 | 0 |
| 1017 | chr19:27150906-27171316 | 0 | 0 | 0 | 1 | 0 |
| 1018 | chr19:28273253-28289556 | 0 | 0 | 0 | 1 | 0 |
| 1019 | chr19:31124513-31141923 | 0 | 0 | 0 | 1 | 0 |
| 1020 | chr19:31295964-31312370 | 0 | 0 | 0 | 1 | 0 |
| 1021 | chr19:32521924-32541328 | 0 | 0 | 0 | 1 | 0 |
| 1022 | chr19:33298401-33312662 | 0 | 0 | 0 | 1 | 0 |
| 1023 | chr19:35000393-35018773 | 0 | 0 | 0 | 1 | 0 |
| 1024 | chr19:35233765-35251120 | 0 | 0 | 0 | 1 | 0 |
| 1025 | chr19:35672172-35686226 | 0 | 0 | 0 | 1 | 0 |
| 1026 | chr19:35693084-35709464 | 0 | 0 | 0 | 1 | 0 |
| 1027 | chr19:37387758-37407111 | 0 | 0 | 0 | 1 | 0 |
| 1028 | chr19:37974218-37988400 | 0 | 0 | 0 | 1 | 0 |
| 1029 | chr19:38504441-38521781 | 0 | 0 | 0 | 1 | 0 |
| 1030 | chr19:39025819-39050555 | 0 | 1 | 0 | 1 | 0 |
| 1031 | chr19:40330761-40353262 | 0 | 0 | 0 | 1 | 0 |
| 1032 | chr19:41521243-41547051 | 0 | 0 | 0 | 1 | 0 |
| 1033 | chr19:46029656-46045865 | 0 | 0 | 0 | 1 | 0 |
| 1034 | chr19:48211336-48229750 | 0 | 0 | 0 | 1 | 0 |
| 1035 | chr19:48951209-48968622 | 0 | 0 | 0 | 1 | 0 |
| 1036 | chr19:50427780-50445084 | 0 | 0 | 0 | 1 | 0 |
| 1037 | chr19:51555456-51601370 | 0 | 0 | 1 | 0 | 0 |

|      |                         |   |   |   |   |   |
|------|-------------------------|---|---|---|---|---|
| 1038 | chr19:53617193-53634673 | 0 | 0 | 0 | 1 | 0 |
| 1039 | chr19:53680186-53696466 | 0 | 0 | 0 | 1 | 0 |
| 1040 | chr19:53733480-53757215 | 0 | 0 | 0 | 1 | 0 |
| 1041 | chr19:53778703-53795012 | 0 | 1 | 0 | 1 | 0 |
| 1042 | chr19:53806220-53824071 | 0 | 0 | 0 | 1 | 0 |
| 1043 | chr19:53865579-53880780 | 0 | 0 | 0 | 1 | 0 |
| 1044 | chr19:54067099-54084536 | 0 | 0 | 0 | 1 | 0 |
| 1045 | chr19:54817785-54831995 | 0 | 0 | 0 | 1 | 0 |
| 1046 | chr19:54921621-54936843 | 0 | 0 | 0 | 1 | 0 |
| 1047 | chr19:55578395-55595716 | 0 | 0 | 0 | 1 | 0 |
| 1048 | chr19:55823999-55842317 | 0 | 0 | 0 | 1 | 0 |
| 1049 | chr19:55895167-55929662 | 1 | 0 | 0 | 0 | 0 |
| 1050 | chr19:56098045-56116444 | 0 | 0 | 0 | 1 | 0 |
| 1051 | chr19:56565459-56586816 | 0 | 0 | 0 | 1 | 0 |
| 1052 | chr19:56655669-56669803 | 0 | 0 | 0 | 1 | 0 |
| 1053 | chr20:7636174-7734734   | 0 | 1 | 0 | 1 | 0 |
| 1054 | chr20:8025788-8043079   | 0 | 0 | 0 | 1 | 0 |
| 1055 | chr20:10480479-10495032 | 0 | 0 | 0 | 1 | 0 |
| 1056 | chr20:10665260-10680404 | 0 | 0 | 0 | 1 | 0 |
| 1057 | chr20:10856779-10877319 | 0 | 0 | 0 | 1 | 0 |
| 1058 | chr20:12623257-12643774 | 0 | 0 | 0 | 1 | 0 |
| 1059 | chr20:12978847-12998254 | 0 | 0 | 0 | 1 | 0 |
| 1060 | chr20:13881129-13895547 | 0 | 0 | 0 | 1 | 0 |
| 1061 | chr20:15145054-15245054 | 0 | 0 | 0 | 0 | 1 |
| 1062 | chr20:19142081-19415399 | 0 | 1 | 0 | 0 | 0 |
| 1063 | chr20:21534740-21552134 | 0 | 0 | 0 | 1 | 0 |
| 1064 | chr20:24938584-24955913 | 0 | 0 | 0 | 1 | 0 |
| 1065 | chr20:25361623-25377935 | 0 | 0 | 0 | 1 | 0 |
| 1066 | chr20:26373123-26396803 | 0 | 1 | 0 | 1 | 0 |
| 1067 | chr20:28572840-28595522 | 0 | 0 | 0 | 1 | 0 |
| 1068 | chr20:30103820-30119155 | 0 | 0 | 0 | 1 | 0 |
| 1069 | chr20:31471500-31488675 | 0 | 0 | 0 | 1 | 0 |
| 1070 | chr20:31846506-31865769 | 0 | 0 | 0 | 1 | 0 |
| 1071 | chr20:34027842-34041988 | 0 | 0 | 0 | 1 | 0 |
| 1072 | chr20:34841343-34855651 | 0 | 0 | 0 | 1 | 0 |
| 1073 | chr20:35028805-35047379 | 0 | 0 | 0 | 1 | 0 |
| 1074 | chr20:49733126-49753474 | 0 | 0 | 0 | 1 | 0 |
| 1075 | chr20:50552585-50585912 | 0 | 1 | 0 | 1 | 0 |
| 1076 | chr20:50667010-50702604 | 0 | 1 | 0 | 1 | 0 |
| 1077 | chr20:50741925-50758278 | 0 | 1 | 0 | 1 | 0 |
| 1078 | chr20:52970170-52986445 | 0 | 0 | 0 | 1 | 0 |
| 1079 | chr20:53979570-54001242 | 0 | 0 | 0 | 1 | 0 |
| 1080 | chr20:54783492-54800817 | 0 | 0 | 0 | 1 | 0 |
| 1081 | chr20:56250024-56304307 | 1 | 1 | 0 | 1 | 0 |
| 1082 | chr20:56657784-56677187 | 0 | 0 | 0 | 1 | 0 |
| 1083 | chr20:57143407-57185508 | 1 | 1 | 0 | 1 | 0 |
| 1084 | chr20:58650237-58665445 | 0 | 0 | 0 | 1 | 0 |
| 1085 | chr20:59396603-59457292 | 0 | 1 | 0 | 1 | 0 |
| 1086 | chr20:60943156-60963777 | 0 | 0 | 0 | 1 | 0 |
| 1087 | chr21:2997898-3034595   | 1 | 0 | 0 | 0 | 0 |
| 1088 | chr21:4584254-4598630   | 0 | 0 | 0 | 1 | 0 |
| 1089 | chr21:6222011-6243199   | 0 | 0 | 0 | 1 | 0 |

|      |                         |   |   |   |   |   |
|------|-------------------------|---|---|---|---|---|
| 1090 | chr21:7029268-7043342   | 0 | 0 | 0 | 1 | 0 |
| 1091 | chr21:7108668-7127942   | 0 | 1 | 0 | 1 | 0 |
| 1092 | chr21:7720608-7734833   | 0 | 0 | 0 | 1 | 0 |
| 1093 | chr21:9438728-9455909   | 0 | 0 | 0 | 1 | 0 |
| 1094 | chr21:10398719-10422677 | 0 | 0 | 0 | 1 | 0 |
| 1095 | chr21:10956482-10974873 | 0 | 0 | 0 | 1 | 0 |
| 1096 | chr21:12909313-12925563 | 0 | 0 | 0 | 1 | 0 |
| 1097 | chr21:16322057-16339510 | 0 | 0 | 0 | 1 | 0 |
| 1098 | chr21:21444975-21465359 | 0 | 0 | 0 | 1 | 0 |
| 1099 | chr21:22110514-22125766 | 0 | 0 | 0 | 1 | 0 |
| 1100 | chr21:22470423-22494301 | 0 | 0 | 0 | 1 | 0 |
| 1101 | chr21:23319121-23336553 | 0 | 0 | 0 | 1 | 0 |
| 1102 | chr21:25802859-25819159 | 0 | 0 | 0 | 1 | 0 |
| 1103 | chr21:29706307-29779822 | 0 | 1 | 1 | 1 | 0 |
| 1104 | chr21:30127964-30150147 | 0 | 1 | 0 | 1 | 0 |
| 1105 | chr21:30160320-30180764 | 1 | 0 | 0 | 0 | 0 |
| 1106 | chr21:30186025-30323483 | 1 | 0 | 0 | 1 | 0 |
| 1107 | chr21:30337946-30358280 | 1 | 0 | 0 | 0 | 0 |
| 1108 | chr21:30818420-30838844 | 0 | 1 | 0 | 1 | 0 |
| 1109 | chr21:31066711-31162768 | 1 | 1 | 0 | 1 | 0 |
| 1110 | chr21:31234283-31288324 | 1 | 0 | 0 | 0 | 0 |
| 1111 | chr21:31548110-31613003 | 1 | 1 | 0 | 1 | 0 |
| 1112 | chr21:31715773-31733999 | 1 | 0 | 0 | 0 | 0 |
| 1113 | chr21:31944078-31982244 | 1 | 0 | 0 | 0 | 0 |
| 1114 | chr21:32294229-32412270 | 1 | 1 | 0 | 1 | 0 |
| 1115 | chr21:33267908-33300866 | 1 | 1 | 0 | 1 | 0 |
| 1116 | chr21:33560201-33597890 | 0 | 1 | 0 | 1 | 0 |
| 1117 | chr21:33760141-33848940 | 0 | 1 | 0 | 1 | 0 |
| 1118 | chr21:34643897-34671641 | 0 | 0 | 0 | 1 | 0 |
| 1119 | chr21:35461060-35479646 | 0 | 0 | 0 | 1 | 0 |
| 1120 | chr21:35760915-35777135 | 0 | 0 | 0 | 1 | 0 |
| 1121 | chr21:39022186-39036340 | 0 | 0 | 0 | 1 | 0 |
| 1122 | chr21:40295437-40315272 | 0 | 0 | 0 | 1 | 0 |
| 1123 | chr21:40749346-40774394 | 1 | 1 | 0 | 1 | 0 |
| 1124 | chr21:43520019-43539398 | 0 | 0 | 0 | 1 | 0 |
| 1125 | chr21:43816021-43843878 | 1 | 0 | 0 | 1 | 0 |
| 1126 | chr21:43850242-43903051 | 1 | 1 | 0 | 1 | 0 |
| 1127 | chr21:44044402-44090600 | 0 | 0 | 1 | 0 | 0 |
| 1128 | chr21:44853310-44867370 | 0 | 0 | 0 | 1 | 0 |
| 1129 | chr21:45127434-45148875 | 0 | 1 | 0 | 1 | 0 |
| 1130 | chr21:46111667-46129204 | 0 | 0 | 0 | 1 | 0 |
| 1131 | chr21:47949855-47964242 | 0 | 0 | 0 | 1 | 0 |
| 1132 | chr21:48194894-49784305 | 0 | 1 | 0 | 0 | 0 |
| 1133 | chr21:49793030-49827716 | 1 | 0 | 0 | 1 | 0 |
| 1134 | chr21:50129928-50145149 | 0 | 1 | 0 | 1 | 0 |
| 1135 | chr21:51221546-51246107 | 0 | 1 | 0 | 1 | 0 |
| 1136 | chr21:52168952-52184155 | 0 | 0 | 0 | 1 | 0 |
| 1137 | chr21:52282027-52297127 | 0 | 0 | 0 | 1 | 0 |
| 1138 | chr21:53567855-53582047 | 0 | 0 | 0 | 1 | 0 |
| 1139 | chr22:3158055-3175545   | 0 | 0 | 0 | 1 | 0 |
| 1140 | chr22:3365755-3380074   | 0 | 0 | 0 | 1 | 0 |
| 1141 | chr22:4707704-4731201   | 0 | 1 | 0 | 1 | 0 |

|      |                         |   |   |   |   |   |
|------|-------------------------|---|---|---|---|---|
| 1142 | chr22:5347342-5363492   | 0 | 0 | 0 | 1 | 0 |
| 1143 | chr22:6408536-6422608   | 0 | 0 | 0 | 1 | 0 |
| 1144 | chr22:12504654-12522292 | 0 | 0 | 0 | 1 | 0 |
| 1145 | chr22:17168881-17186351 | 0 | 0 | 0 | 1 | 0 |
| 1146 | chr22:17830166-17857049 | 0 | 1 | 0 | 1 | 0 |
| 1147 | chr22:18060990-18076998 | 0 | 0 | 0 | 1 | 0 |
| 1148 | chr22:18467887-18486090 | 0 | 0 | 0 | 1 | 0 |
| 1149 | chr22:21475119-21501904 | 0 | 1 | 0 | 1 | 0 |
| 1150 | chr22:23414672-23432957 | 0 | 1 | 0 | 1 | 0 |
| 1151 | chr22:32683500-32783500 | 0 | 0 | 0 | 0 | 1 |
| 1152 | chr22:34295553-34309586 | 0 | 0 | 0 | 1 | 0 |
| 1153 | chr22:38399244-38425067 | 0 | 0 | 0 | 1 | 0 |
| 1154 | chr22:38705399-38733271 | 0 | 1 | 0 | 1 | 0 |
| 1155 | chr22:38764222-38811016 | 0 | 1 | 0 | 1 | 0 |
| 1156 | chr22:40345255-40359603 | 0 | 0 | 0 | 1 | 0 |
| 1157 | chr22:40514699-40529823 | 0 | 0 | 0 | 1 | 0 |
| 1158 | chr22:40554445-40582326 | 0 | 1 | 0 | 1 | 0 |
| 1159 | chr22:42396050-42411223 | 0 | 1 | 0 | 1 | 0 |
| 1160 | chr22:43323523-43341869 | 0 | 0 | 0 | 1 | 0 |
| 1161 | chr22:46895311-46926282 | 0 | 1 | 0 | 1 | 0 |
| 1162 | chr22:48915507-48932901 | 0 | 0 | 0 | 1 | 0 |
| 1163 | chr22:53883081-53899528 | 0 | 0 | 0 | 1 | 0 |
| 1164 | chr22:54237126-54272402 | 0 | 1 | 0 | 1 | 0 |
| 1165 | chr22:54484650-54500831 | 0 | 0 | 0 | 1 | 0 |
| 1166 | chr22:56690076-56739245 | 1 | 0 | 0 | 0 | 0 |
| 1167 | chr22:57878034-58017926 | 0 | 0 | 1 | 0 | 0 |
| 1168 | chr22:58071103-58094719 | 0 | 0 | 0 | 1 | 0 |
| 1169 | chr22:63223261-63237605 | 0 | 0 | 0 | 1 | 0 |
| 1170 | chr22:63906652-63921982 | 0 | 0 | 0 | 1 | 0 |
| 1171 | chr22:63934987-63950303 | 0 | 0 | 0 | 1 | 0 |
| 1172 | chr22:64375529-64394499 | 1 | 0 | 0 | 0 | 0 |
| 1173 | chr23:4293251-4316755   | 0 | 0 | 0 | 1 | 0 |
| 1174 | chr23:5645028-5660328   | 0 | 1 | 0 | 1 | 0 |
| 1175 | chr23:6160278-6175714   | 0 | 0 | 0 | 1 | 0 |
| 1176 | chr23:8436970-8452247   | 0 | 0 | 0 | 1 | 0 |
| 1177 | chr23:9941671-9960191   | 0 | 0 | 0 | 1 | 0 |
| 1178 | chr23:12966555-12985087 | 0 | 0 | 0 | 1 | 0 |
| 1179 | chr23:13662209-13679673 | 0 | 0 | 0 | 1 | 0 |
| 1180 | chr23:14435704-14453159 | 0 | 0 | 0 | 1 | 0 |
| 1181 | chr23:17224457-17242669 | 0 | 0 | 0 | 1 | 0 |
| 1182 | chr23:18164633-18216806 | 1 | 1 | 0 | 1 | 0 |
| 1183 | chr23:20793152-20808341 | 0 | 0 | 0 | 1 | 0 |
| 1184 | chr23:21598691-21616955 | 0 | 0 | 0 | 1 | 0 |
| 1185 | chr23:21709002-21726652 | 0 | 0 | 0 | 1 | 0 |
| 1186 | chr23:22518403-22545279 | 0 | 0 | 0 | 1 | 0 |
| 1187 | chr23:23532155-23793196 | 0 | 1 | 1 | 1 | 0 |
| 1188 | chr23:25229279-25243449 | 0 | 0 | 0 | 1 | 0 |
| 1189 | chr23:26795168-26809601 | 0 | 0 | 0 | 1 | 0 |
| 1190 | chr23:31538871-31563401 | 0 | 0 | 0 | 1 | 0 |
| 1191 | chr23:31915013-31929176 | 0 | 0 | 0 | 1 | 0 |
| 1192 | chr23:34830389-34852822 | 0 | 0 | 0 | 1 | 0 |
| 1193 | chr23:35640565-35656993 | 0 | 0 | 0 | 1 | 0 |

|      |                         |   |   |   |   |   |
|------|-------------------------|---|---|---|---|---|
| 1194 | chr23:36475109-36500940 | 0 | 1 | 0 | 1 | 0 |
| 1195 | chr23:37338766-37358105 | 1 | 0 | 0 | 1 | 0 |
| 1196 | chr23:38163807-38181305 | 0 | 0 | 0 | 1 | 0 |
| 1197 | chr23:38256705-38270710 | 0 | 0 | 0 | 1 | 0 |
| 1198 | chr23:43516328-43566328 | 0 | 0 | 0 | 0 | 1 |
| 1199 | chr23:44755150-44772431 | 0 | 0 | 0 | 1 | 0 |
| 1200 | chr23:45552460-45571863 | 0 | 0 | 0 | 1 | 0 |
| 1201 | chr23:46339392-46353492 | 0 | 0 | 0 | 1 | 0 |
| 1202 | chr23:48531185-48547650 | 0 | 0 | 0 | 1 | 0 |
| 1203 | chr23:48746193-48765531 | 0 | 0 | 0 | 1 | 0 |
| 1204 | chr23:48927046-48944406 | 0 | 0 | 0 | 1 | 0 |
| 1205 | chr23:50606148-50625430 | 0 | 1 | 0 | 1 | 0 |
| 1206 | chr23:51242758-51265657 | 0 | 1 | 0 | 1 | 0 |
| 1207 | chr23:52028057-52045391 | 0 | 0 | 0 | 1 | 0 |
| 1208 | chr23:52717248-52732392 | 0 | 0 | 0 | 1 | 0 |
| 1209 | chr23:54473811-54487874 | 0 | 0 | 0 | 1 | 0 |
| 1210 | chr23:55211210-55225447 | 0 | 0 | 0 | 1 | 0 |
| 1211 | chr24:2996041-3022534   | 1 | 0 | 0 | 0 | 0 |
| 1212 | chr24:7580001-7638310   | 0 | 1 | 0 | 1 | 0 |
| 1213 | chr24:10331497-10352029 | 0 | 0 | 0 | 1 | 0 |
| 1214 | chr24:11287506-11305807 | 0 | 1 | 0 | 1 | 0 |
| 1215 | chr24:13217761-13244178 | 1 | 0 | 0 | 0 | 0 |
| 1216 | chr24:13728383-13746919 | 0 | 0 | 0 | 1 | 0 |
| 1217 | chr24:17409459-17425978 | 0 | 0 | 0 | 1 | 0 |
| 1218 | chr24:17612090-17633154 | 0 | 0 | 0 | 1 | 0 |
| 1219 | chr24:17649770-17699770 | 0 | 0 | 0 | 0 | 1 |
| 1220 | chr24:20658974-20677377 | 0 | 0 | 0 | 1 | 0 |
| 1221 | chr24:22224078-22384923 | 1 | 1 | 0 | 1 | 0 |
| 1222 | chr24:25251438-25265553 | 0 | 0 | 0 | 1 | 0 |
| 1223 | chr24:29006520-29024775 | 0 | 0 | 0 | 1 | 0 |
| 1224 | chr24:30496879-30515244 | 0 | 0 | 0 | 1 | 0 |
| 1225 | chr24:33557098-33572403 | 0 | 0 | 0 | 1 | 0 |
| 1226 | chr24:33944587-33959893 | 0 | 0 | 0 | 1 | 0 |
| 1227 | chr24:34342251-34360836 | 0 | 0 | 0 | 1 | 0 |
| 1228 | chr24:34720415-34734644 | 0 | 0 | 0 | 1 | 0 |
| 1229 | chr24:34763106-34778158 | 0 | 0 | 0 | 1 | 0 |
| 1230 | chr24:37068139-37084437 | 0 | 0 | 0 | 1 | 0 |
| 1231 | chr24:37807301-37841454 | 0 | 1 | 0 | 1 | 0 |
| 1232 | chr24:37917004-37932279 | 0 | 0 | 0 | 1 | 0 |
| 1233 | chr24:38040350-38058560 | 0 | 0 | 0 | 1 | 0 |
| 1234 | chr24:38363747-38387346 | 0 | 1 | 0 | 1 | 0 |
| 1235 | chr24:38961222-38975420 | 0 | 0 | 0 | 1 | 0 |
| 1236 | chr24:40518797-40540204 | 0 | 0 | 0 | 1 | 0 |
| 1237 | chr24:40706172-40726599 | 0 | 0 | 0 | 1 | 0 |
| 1238 | chr24:43604641-43618889 | 0 | 0 | 0 | 1 | 0 |
| 1239 | chr24:48024558-48046099 | 0 | 1 | 0 | 1 | 0 |
| 1240 | chr24:48118012-48145840 | 1 | 0 | 0 | 0 | 0 |
| 1241 | chr24:48419924-48435607 | 0 | 0 | 0 | 1 | 0 |
| 1242 | chr24:48839419-48857654 | 0 | 0 | 0 | 1 | 0 |
| 1243 | chr24:48980455-49019805 | 0 | 1 | 0 | 1 | 0 |
| 1244 | chr24:49777249-49794796 | 0 | 0 | 0 | 1 | 0 |
| 1245 | chr25:2996041-3051488   | 1 | 0 | 0 | 0 | 0 |



|      |                         |   |   |   |   |   |
|------|-------------------------|---|---|---|---|---|
| 1246 | chr25:5203966-5223488   | 0 | 1 | 0 | 1 | 0 |
| 1247 | chr25:8520832-8620832   | 0 | 0 | 0 | 0 | 1 |
| 1248 | chr25:13894361-13911774 | 0 | 0 | 0 | 1 | 0 |
| 1249 | chr25:14001997-14020060 | 0 | 0 | 0 | 1 | 0 |
| 1250 | chr25:15160805-15178293 | 0 | 0 | 0 | 1 | 0 |
| 1251 | chr25:17226533-17248954 | 0 | 0 | 0 | 1 | 0 |
| 1252 | chr25:17734127-17751266 | 0 | 0 | 0 | 1 | 0 |
| 1253 | chr25:17938108-17954435 | 0 | 0 | 0 | 1 | 0 |
| 1254 | chr25:18511545-18527999 | 0 | 0 | 0 | 1 | 0 |
| 1255 | chr25:18547584-18562736 | 0 | 0 | 0 | 1 | 0 |
| 1256 | chr25:21510856-21525024 | 0 | 0 | 0 | 1 | 0 |
| 1257 | chr25:22022943-22052833 | 0 | 1 | 0 | 0 | 0 |
| 1258 | chr25:22316792-22339391 | 0 | 0 | 0 | 1 | 0 |
| 1259 | chr25:22697599-22747936 | 1 | 0 | 0 | 0 | 0 |
| 1260 | chr25:22800112-22873921 | 1 | 0 | 0 | 0 | 0 |
| 1261 | chr25:24270181-24285516 | 0 | 0 | 0 | 1 | 0 |
| 1262 | chr25:26493083-26508484 | 0 | 0 | 0 | 1 | 0 |
| 1263 | chr25:29028107-29046336 | 0 | 0 | 0 | 1 | 0 |
| 1264 | chr25:29092563-29109829 | 0 | 0 | 0 | 1 | 0 |
| 1265 | chr25:29375057-29389299 | 0 | 0 | 0 | 1 | 0 |
| 1266 | chr25:30776515-30790730 | 0 | 0 | 0 | 1 | 0 |
| 1267 | chr25:33718933-33734618 | 0 | 0 | 0 | 1 | 0 |
| 1268 | chr25:35940265-35959709 | 0 | 0 | 0 | 1 | 0 |
| 1269 | chr25:36755890-36775308 | 0 | 0 | 0 | 1 | 0 |
| 1270 | chr25:37299780-37314967 | 0 | 0 | 0 | 1 | 0 |
| 1271 | chr25:37504601-37523004 | 0 | 0 | 0 | 1 | 0 |
| 1272 | chr25:38818061-38835462 | 0 | 1 | 0 | 1 | 0 |
| 1273 | chr25:40120259-40140724 | 0 | 0 | 0 | 1 | 0 |
| 1274 | chr25:40532110-40551881 | 0 | 0 | 0 | 1 | 0 |
| 1275 | chr25:40936619-40953876 | 0 | 0 | 0 | 1 | 0 |
| 1276 | chr25:41158253-41178893 | 0 | 0 | 0 | 1 | 0 |
| 1277 | chr25:42915653-42951864 | 0 | 0 | 0 | 1 | 0 |
| 1278 | chr25:48051062-48118154 | 1 | 1 | 0 | 1 | 0 |
| 1279 | chr25:48773165-48791431 | 0 | 0 | 0 | 1 | 0 |
| 1280 | chr25:49291603-49312459 | 0 | 0 | 0 | 1 | 0 |
| 1281 | chr25:49370551-49384892 | 0 | 0 | 0 | 1 | 0 |
| 1282 | chr25:49643673-49657950 | 0 | 0 | 0 | 1 | 0 |
| 1283 | chr25:50600629-50616865 | 0 | 0 | 0 | 1 | 0 |
| 1284 | chr25:52332995-52347153 | 0 | 0 | 0 | 1 | 0 |
| 1285 | chr25:52372248-52388348 | 0 | 0 | 0 | 1 | 0 |
| 1286 | chr25:53000035-53020550 | 1 | 1 | 0 | 1 | 0 |
| 1287 | chr25:53114029-53201829 | 1 | 1 | 0 | 1 | 0 |
| 1288 | chr25:53216808-53251504 | 0 | 1 | 0 | 1 | 0 |
| 1289 | chr25:53261470-53293387 | 1 | 0 | 0 | 0 | 0 |
| 1290 | chr25:54173461-54189557 | 0 | 0 | 0 | 1 | 0 |
| 1291 | chr26:4244419-4260637   | 0 | 0 | 0 | 1 | 0 |
| 1292 | chr26:4750223-4765436   | 0 | 0 | 0 | 1 | 0 |
| 1293 | chr26:5705921-5727204   | 0 | 1 | 0 | 0 | 0 |
| 1294 | chr26:6246198-6261328   | 0 | 0 | 0 | 1 | 0 |
| 1295 | chr26:11270735-11287999 | 0 | 0 | 0 | 1 | 0 |
| 1296 | chr26:12440280-12479237 | 1 | 0 | 0 | 0 | 0 |
| 1297 | chr26:15764819-15784418 | 0 | 1 | 0 | 1 | 0 |

|      |                         |   |   |   |   |   |
|------|-------------------------|---|---|---|---|---|
| 1298 | chr26:19354650-19368670 | 0 | 0 | 0 | 1 | 0 |
| 1299 | chr26:20022823-20078322 | 1 | 0 | 0 | 1 | 0 |
| 1300 | chr26:21951766-22000083 | 1 | 1 | 0 | 1 | 0 |
| 1301 | chr26:22257442-22271591 | 0 | 0 | 0 | 1 | 0 |
| 1302 | chr26:23258102-23273488 | 0 | 0 | 0 | 1 | 0 |
| 1303 | chr26:24017860-24031965 | 0 | 0 | 0 | 1 | 0 |
| 1304 | chr26:24108238-24130705 | 0 | 0 | 0 | 1 | 0 |
| 1305 | chr26:25392820-25406925 | 0 | 0 | 0 | 1 | 0 |
| 1306 | chr26:28042205-29096517 | 1 | 1 | 0 | 1 | 0 |
| 1307 | chr26:29142411-29621741 | 1 | 1 | 0 | 1 | 0 |
| 1308 | chr26:29628536-29731810 | 1 | 0 | 0 | 1 | 0 |
| 1309 | chr26:29780834-29830103 | 1 | 1 | 0 | 1 | 0 |
| 1310 | chr26:29840689-29859218 | 1 | 0 | 0 | 0 | 0 |
| 1311 | chr26:29890733-29919689 | 1 | 0 | 0 | 0 | 0 |
| 1312 | chr26:30007328-30049569 | 0 | 1 | 0 | 1 | 0 |
| 1313 | chr26:30223896-30297483 | 0 | 1 | 1 | 1 | 0 |
| 1314 | chr26:30354842-30632001 | 1 | 1 | 0 | 1 | 0 |
| 1315 | chr26:30671363-30697966 | 1 | 1 | 0 | 1 | 0 |
| 1316 | chr26:31890098-32000206 | 1 | 1 | 0 | 1 | 0 |
| 1317 | chr26:34221628-34697632 | 1 | 1 | 0 | 1 | 0 |
| 1318 | chr26:35166197-35183496 | 0 | 0 | 0 | 1 | 0 |
| 1319 | chr26:35485091-35503359 | 0 | 1 | 0 | 1 | 0 |
| 1320 | chr26:36197259-36219650 | 0 | 0 | 0 | 1 | 0 |
| 1321 | chr26:37355730-37382534 | 0 | 0 | 0 | 1 | 0 |
| 1322 | chr26:37388335-37405690 | 0 | 1 | 0 | 1 | 0 |
| 1323 | chr26:39321021-39337404 | 0 | 0 | 0 | 1 | 0 |
| 1324 | chr26:41456636-41471702 | 0 | 0 | 0 | 1 | 0 |
| 1325 | chr26:41783265-41803890 | 0 | 0 | 0 | 1 | 0 |
| 1326 | chr27:3516987-3534477   | 0 | 0 | 0 | 1 | 0 |
| 1327 | chr27:3713564-3729764   | 0 | 0 | 0 | 1 | 0 |
| 1328 | chr27:5352510-5368763   | 0 | 0 | 0 | 1 | 0 |
| 1329 | chr27:5688193-5709849   | 0 | 0 | 0 | 1 | 0 |
| 1330 | chr27:6193651-6208753   | 0 | 0 | 0 | 1 | 0 |
| 1331 | chr27:6523059-6587460   | 0 | 1 | 0 | 1 | 0 |
| 1332 | chr27:8934072-8963399   | 1 | 0 | 0 | 0 | 0 |
| 1333 | chr27:8988491-9008754   | 1 | 0 | 0 | 0 | 0 |
| 1334 | chr27:9015577-9076710   | 1 | 1 | 0 | 0 | 0 |
| 1335 | chr27:9356562-9381857   | 0 | 0 | 0 | 1 | 0 |
| 1336 | chr27:10013694-10031188 | 0 | 0 | 0 | 1 | 0 |
| 1337 | chr27:12194655-12209009 | 0 | 0 | 0 | 1 | 0 |
| 1338 | chr27:13728642-13742755 | 0 | 0 | 0 | 1 | 0 |
| 1339 | chr27:16136865-16217123 | 1 | 1 | 0 | 1 | 0 |
| 1340 | chr27:17460450-17502000 | 0 | 0 | 1 | 0 | 0 |
| 1341 | chr27:18253370-18271051 | 0 | 0 | 0 | 1 | 0 |
| 1342 | chr27:20927218-20955534 | 0 | 1 | 0 | 1 | 0 |
| 1343 | chr27:21527548-21541669 | 0 | 0 | 0 | 1 | 0 |
| 1344 | chr27:22225560-22239611 | 0 | 0 | 0 | 1 | 0 |
| 1345 | chr27:22278103-22293507 | 0 | 0 | 0 | 1 | 0 |
| 1346 | chr27:24368392-24384657 | 0 | 0 | 0 | 1 | 0 |
| 1347 | chr27:24467197-24494365 | 0 | 0 | 0 | 1 | 0 |
| 1348 | chr27:28693064-29201491 | 1 | 1 | 1 | 1 | 0 |
| 1349 | chr27:31079289-31094552 | 0 | 1 | 0 | 1 | 0 |

|      |                         |   |   |   |   |   |
|------|-------------------------|---|---|---|---|---|
| 1350 | chr27:32646539-32661837 | 0 | 0 | 0 | 1 | 0 |
| 1351 | chr27:32866210-32884800 | 0 | 0 | 0 | 1 | 0 |
| 1352 | chr27:33181401-33200886 | 0 | 0 | 0 | 1 | 0 |
| 1353 | chr27:35040923-35056086 | 0 | 0 | 0 | 1 | 0 |
| 1354 | chr27:36120045-36136371 | 0 | 0 | 0 | 1 | 0 |
| 1355 | chr27:36554185-36570318 | 0 | 0 | 0 | 1 | 0 |
| 1356 | chr27:37699945-37716184 | 0 | 0 | 0 | 1 | 0 |
| 1357 | chr27:38012742-38035493 | 0 | 1 | 0 | 1 | 0 |
| 1358 | chr27:38321522-38414452 | 1 | 1 | 0 | 1 | 0 |
| 1359 | chr27:38433606-38480859 | 1 | 0 | 0 | 1 | 0 |
| 1360 | chr27:38548124-38569634 | 0 | 1 | 0 | 1 | 0 |
| 1361 | chr27:38679579-38700107 | 0 | 1 | 0 | 1 | 0 |
| 1362 | chr27:38735159-38760791 | 0 | 1 | 0 | 1 | 0 |
| 1363 | chr27:40735022-40757615 | 1 | 0 | 0 | 0 | 0 |
| 1364 | chr27:41357369-41375797 | 0 | 0 | 0 | 1 | 0 |
| 1365 | chr27:41673582-41694046 | 0 | 0 | 0 | 1 | 0 |
| 1366 | chr27:41779068-41798631 | 0 | 0 | 0 | 1 | 0 |
| 1367 | chr27:43149899-43173454 | 0 | 0 | 0 | 1 | 0 |
| 1368 | chr28:4149457-4163636   | 0 | 0 | 0 | 1 | 0 |
| 1369 | chr28:6072061-6088379   | 0 | 0 | 0 | 1 | 0 |
| 1370 | chr28:6229232-6255235   | 0 | 0 | 0 | 1 | 0 |
| 1371 | chr28:10537470-10554728 | 0 | 1 | 0 | 1 | 0 |
| 1372 | chr28:12551993-12567302 | 0 | 0 | 0 | 1 | 0 |
| 1373 | chr28:16079113-16114951 | 1 | 1 | 0 | 1 | 0 |
| 1374 | chr28:16855320-16874758 | 0 | 0 | 0 | 1 | 0 |
| 1375 | chr28:18683324-18698806 | 0 | 1 | 0 | 1 | 0 |
| 1376 | chr28:27344074-27444074 | 0 | 0 | 0 | 0 | 1 |
| 1377 | chr28:27944376-27975599 | 0 | 1 | 0 | 1 | 0 |
| 1378 | chr28:29898178-29914541 | 0 | 0 | 0 | 1 | 0 |
| 1379 | chr28:31219892-31236163 | 0 | 0 | 0 | 1 | 0 |
| 1380 | chr28:31475199-31489476 | 0 | 1 | 0 | 1 | 0 |
| 1381 | chr28:35163298-35182806 | 0 | 0 | 0 | 1 | 0 |
| 1382 | chr28:35216839-35273034 | 1 | 1 | 0 | 1 | 0 |
| 1383 | chr28:35278039-35297247 | 1 | 0 | 0 | 0 | 0 |
| 1384 | chr28:36429379-36445175 | 0 | 0 | 0 | 1 | 0 |
| 1385 | chr28:38017124-38033327 | 0 | 0 | 0 | 1 | 0 |
| 1386 | chr28:40307797-40322048 | 0 | 0 | 0 | 1 | 0 |
| 1387 | chr28:40581808-40599287 | 0 | 0 | 0 | 1 | 0 |
| 1388 | chr28:42264007-42281489 | 0 | 0 | 0 | 1 | 0 |
| 1389 | chr28:42636997-42681226 | 0 | 0 | 0 | 1 | 0 |
| 1390 | chr28:42836680-42851920 | 0 | 0 | 0 | 1 | 0 |
| 1391 | chr28:43666254-43680763 | 0 | 0 | 0 | 1 | 0 |
| 1392 | chr29:4580672-4627657   | 0 | 1 | 0 | 1 | 0 |
| 1393 | chr29:4876405-4897046   | 0 | 1 | 0 | 1 | 0 |
| 1394 | chr29:5149865-5166250   | 0 | 0 | 0 | 1 | 0 |
| 1395 | chr29:5229580-5246712   | 0 | 0 | 0 | 1 | 0 |
| 1396 | chr29:6016326-6040991   | 0 | 1 | 0 | 1 | 0 |
| 1397 | chr29:6087214-6108044   | 0 | 0 | 0 | 1 | 0 |
| 1398 | chr29:9026577-9047041   | 0 | 1 | 0 | 1 | 0 |
| 1399 | chr29:10178566-10196957 | 0 | 0 | 0 | 1 | 0 |
| 1400 | chr29:10868501-10886665 | 0 | 1 | 0 | 1 | 0 |
| 1401 | chr29:14852409-14868955 | 0 | 0 | 0 | 1 | 0 |

|      |                         |   |   |   |   |   |
|------|-------------------------|---|---|---|---|---|
| 1402 | chr29:15723970-15739103 | 0 | 1 | 0 | 1 | 0 |
| 1403 | chr29:16132607-16152968 | 0 | 0 | 0 | 1 | 0 |
| 1404 | chr29:16785012-16799252 | 0 | 0 | 0 | 1 | 0 |
| 1405 | chr29:21688863-21705008 | 0 | 0 | 0 | 1 | 0 |
| 1406 | chr29:22218301-22245066 | 0 | 1 | 0 | 1 | 0 |
| 1407 | chr29:23766218-23781306 | 0 | 0 | 0 | 1 | 0 |
| 1408 | chr29:25321856-25336111 | 0 | 0 | 0 | 1 | 0 |
| 1409 | chr29:26323879-26423879 | 0 | 0 | 0 | 0 | 1 |
| 1410 | chr29:26627316-26641302 | 0 | 0 | 0 | 1 | 0 |
| 1411 | chr29:26668462-26686828 | 0 | 0 | 0 | 1 | 0 |
| 1412 | chr29:27654616-27675067 | 0 | 0 | 0 | 1 | 0 |
| 1413 | chr29:28004162-28020586 | 0 | 0 | 0 | 1 | 0 |
| 1414 | chr29:28845005-28859207 | 0 | 0 | 0 | 1 | 0 |
| 1415 | chr29:29546185-29560253 | 0 | 0 | 0 | 1 | 0 |
| 1416 | chr29:30171837-30191244 | 0 | 0 | 0 | 1 | 0 |
| 1417 | chr29:30223215-30250697 | 0 | 1 | 0 | 1 | 0 |
| 1418 | chr29:38332626-38349202 | 0 | 0 | 0 | 1 | 0 |
| 1419 | chr29:38369226-38410415 | 0 | 0 | 1 | 0 | 0 |
| 1420 | chr29:38476532-38496980 | 0 | 0 | 0 | 1 | 0 |
| 1421 | chr29:38818009-38871017 | 0 | 1 | 0 | 0 | 0 |
| 1422 | chr29:39292863-39307088 | 0 | 0 | 0 | 1 | 0 |
| 1423 | chr29:43034924-43051255 | 0 | 0 | 0 | 1 | 0 |
| 1424 | chr29:43522354-43536600 | 0 | 0 | 0 | 1 | 0 |
| 1425 | chr29:44400664-44418161 | 0 | 0 | 0 | 1 | 0 |
| 1426 | chr29:44763817-44827901 | 1 | 0 | 0 | 0 | 0 |
| 1427 | chr30:3157321-3175915   | 0 | 0 | 0 | 1 | 0 |
| 1428 | chr30:8843151-8862805   | 0 | 0 | 0 | 1 | 0 |
| 1429 | chr30:14783654-14801972 | 0 | 0 | 0 | 1 | 0 |
| 1430 | chr30:15531426-15548738 | 0 | 0 | 0 | 1 | 0 |
| 1431 | chr30:20095660-20115028 | 0 | 0 | 0 | 1 | 0 |
| 1432 | chr30:25187620-25206034 | 0 | 0 | 0 | 1 | 0 |
| 1433 | chr30:26026052-26041145 | 0 | 0 | 0 | 1 | 0 |
| 1434 | chr30:29040635-29057910 | 0 | 1 | 0 | 1 | 0 |
| 1435 | chr30:29434282-29448467 | 0 | 0 | 0 | 1 | 0 |
| 1436 | chr30:30946870-30961059 | 0 | 0 | 0 | 1 | 0 |
| 1437 | chr30:33403247-33424718 | 0 | 0 | 0 | 1 | 0 |
| 1438 | chr30:33922447-33938540 | 0 | 0 | 0 | 1 | 0 |
| 1439 | chr30:34967859-34983119 | 0 | 0 | 0 | 1 | 0 |
| 1440 | chr30:35759905-35782123 | 0 | 0 | 0 | 1 | 0 |
| 1441 | chr30:39078045-39092112 | 0 | 0 | 0 | 1 | 0 |
| 1442 | chr30:40464105-40492810 | 1 | 0 | 0 | 0 | 0 |
| 1443 | chr30:40716071-40730342 | 0 | 0 | 0 | 1 | 0 |
| 1444 | chr30:40782873-40833444 | 1 | 1 | 0 | 1 | 0 |
| 1445 | chr30:42153993-42168116 | 0 | 0 | 0 | 1 | 0 |
| 1446 | chr31:6271310-6292704   | 0 | 1 | 0 | 1 | 0 |
| 1447 | chr31:12953492-13053492 | 0 | 0 | 0 | 0 | 1 |
| 1448 | chr31:13346932-13365235 | 0 | 0 | 0 | 1 | 0 |
| 1449 | chr31:17012486-17040714 | 0 | 0 | 0 | 1 | 0 |
| 1450 | chr31:20134172-20152685 | 0 | 0 | 0 | 1 | 0 |
| 1451 | chr31:21597044-21612400 | 0 | 0 | 0 | 1 | 0 |
| 1452 | chr31:24148062-24162183 | 0 | 0 | 0 | 1 | 0 |
| 1453 | chr31:25440665-25468663 | 0 | 1 | 0 | 1 | 0 |

|      |                         |   |   |   |   |   |
|------|-------------------------|---|---|---|---|---|
| 1454 | chr31:26577955-26596665 | 0 | 0 | 0 | 1 | 0 |
| 1455 | chr31:30136024-30150016 | 0 | 0 | 0 | 1 | 0 |
| 1456 | chr31:30221295-30242782 | 0 | 0 | 0 | 1 | 0 |
| 1457 | chr31:31845799-31859895 | 0 | 0 | 0 | 1 | 0 |
| 1458 | chr31:33431847-33486855 | 1 | 1 | 0 | 1 | 0 |
| 1459 | chr31:34532053-34562863 | 0 | 0 | 0 | 1 | 0 |
| 1460 | chr31:36392100-36410582 | 0 | 0 | 0 | 1 | 0 |
| 1461 | chr31:38195449-38543159 | 0 | 1 | 1 | 1 | 0 |
| 1462 | chr31:38943109-38969932 | 0 | 0 | 0 | 1 | 0 |
| 1463 | chr31:39167215-39186718 | 0 | 0 | 0 | 1 | 0 |
| 1464 | chr31:39268869-39288525 | 0 | 0 | 0 | 1 | 0 |
| 1465 | chr31:39583913-39618833 | 0 | 0 | 0 | 1 | 0 |
| 1466 | chr31:39861272-39877517 | 0 | 0 | 0 | 1 | 0 |
| 1467 | chr31:40458693-40473730 | 0 | 1 | 0 | 1 | 0 |
| 1468 | chr31:40617054-40663817 | 1 | 1 | 0 | 1 | 0 |
| 1469 | chr31:41401230-41415344 | 0 | 0 | 0 | 1 | 0 |
| 1470 | chr32:4541887-4557149   | 0 | 0 | 0 | 1 | 0 |
| 1471 | chr32:5281053-5297384   | 0 | 0 | 0 | 1 | 0 |
| 1472 | chr32:5625474-5639632   | 0 | 0 | 0 | 1 | 0 |
| 1473 | chr32:5899651-5913703   | 0 | 0 | 0 | 1 | 0 |
| 1474 | chr32:7004303-7019780   | 0 | 0 | 0 | 1 | 0 |
| 1475 | chr32:7245599-7268119   | 0 | 0 | 0 | 1 | 0 |
| 1476 | chr32:7834098-7851652   | 0 | 0 | 0 | 1 | 0 |
| 1477 | chr32:8079713-8094030   | 0 | 0 | 0 | 1 | 0 |
| 1478 | chr32:8395450-8419186   | 0 | 0 | 0 | 1 | 0 |
| 1479 | chr32:10790053-10805530 | 0 | 0 | 0 | 1 | 0 |
| 1480 | chr32:11761431-11778884 | 0 | 0 | 0 | 1 | 0 |
| 1481 | chr32:17786069-17944153 | 0 | 0 | 1 | 0 | 0 |
| 1482 | chr32:21857739-21871995 | 0 | 0 | 0 | 1 | 0 |
| 1483 | chr32:22730937-22747320 | 0 | 1 | 0 | 1 | 0 |
| 1484 | chr32:25482769-25496907 | 0 | 0 | 0 | 1 | 0 |
| 1485 | chr32:28482851-28501002 | 0 | 0 | 0 | 1 | 0 |
| 1486 | chr32:35230530-35249889 | 0 | 0 | 0 | 1 | 0 |
| 1487 | chr32:41384081-41464581 | 1 | 0 | 0 | 1 | 0 |
| 1488 | chr32:41592939-41721789 | 1 | 0 | 0 | 1 | 0 |
| 1489 | chr33:3078240-3097653   | 0 | 0 | 0 | 1 | 0 |
| 1490 | chr33:5009487-5023639   | 0 | 0 | 0 | 1 | 0 |
| 1491 | chr33:5280295-5301393   | 1 | 0 | 0 | 0 | 0 |
| 1492 | chr33:5355779-5370994   | 0 | 0 | 0 | 1 | 0 |
| 1493 | chr33:5627880-5893354   | 0 | 1 | 0 | 0 | 0 |
| 1494 | chr33:6071210-6088566   | 0 | 0 | 0 | 1 | 0 |
| 1495 | chr33:7241101-7260538   | 0 | 1 | 0 | 1 | 0 |
| 1496 | chr33:7587426-7605849   | 0 | 0 | 0 | 1 | 0 |
| 1497 | chr33:7945194-7969303   | 0 | 0 | 0 | 1 | 0 |
| 1498 | chr33:8117844-8135976   | 1 | 0 | 0 | 0 | 0 |
| 1499 | chr33:11814760-11832450 | 0 | 0 | 0 | 1 | 0 |
| 1500 | chr33:13596342-13610365 | 0 | 0 | 0 | 1 | 0 |
| 1501 | chr33:17213802-17231397 | 0 | 0 | 0 | 1 | 0 |
| 1502 | chr33:17741995-17831930 | 0 | 0 | 0 | 1 | 0 |
| 1503 | chr33:18263437-18280710 | 0 | 0 | 0 | 1 | 0 |
| 1504 | chr33:19745521-19769236 | 0 | 1 | 0 | 1 | 0 |
| 1505 | chr33:22855483-22870802 | 0 | 0 | 0 | 1 | 0 |

|      |                         |   |   |   |   |   |
|------|-------------------------|---|---|---|---|---|
| 1506 | chr33:23268085-23283152 | 0 | 0 | 0 | 1 | 0 |
| 1507 | chr33:23321720-23403572 | 0 | 0 | 1 | 0 | 0 |
| 1508 | chr33:23421000-23521000 | 0 | 0 | 0 | 0 | 1 |
| 1509 | chr33:23562255-23578584 | 0 | 0 | 0 | 1 | 0 |
| 1510 | chr33:31105465-31125546 | 0 | 0 | 0 | 1 | 0 |
| 1511 | chr33:32118630-32134770 | 0 | 0 | 0 | 1 | 0 |
| 1512 | chr33:33464978-33480757 | 0 | 0 | 0 | 1 | 0 |
| 1513 | chr33:33870591-33888030 | 0 | 0 | 0 | 1 | 0 |
| 1514 | chr33:34345579-34360731 | 0 | 0 | 0 | 1 | 0 |
| 1515 | chr34:4207926-4256266   | 0 | 1 | 0 | 1 | 0 |
| 1516 | chr34:8262239-8279554   | 0 | 0 | 0 | 1 | 0 |
| 1517 | chr34:12536268-12561001 | 0 | 1 | 0 | 1 | 0 |
| 1518 | chr34:12882773-12902164 | 0 | 0 | 0 | 1 | 0 |
| 1519 | chr34:14346798-14520557 | 0 | 1 | 0 | 0 | 0 |
| 1520 | chr34:15145385-15175115 | 0 | 1 | 0 | 1 | 0 |
| 1521 | chr34:15217534-15233637 | 0 | 0 | 0 | 1 | 0 |
| 1522 | chr34:20149601-20172455 | 0 | 0 | 0 | 1 | 0 |
| 1523 | chr34:20361397-20376550 | 0 | 0 | 0 | 1 | 0 |
| 1524 | chr34:21566500-21666500 | 0 | 0 | 0 | 0 | 1 |
| 1525 | chr34:23668240-23683416 | 0 | 0 | 0 | 1 | 0 |
| 1526 | chr34:26610830-26627001 | 0 | 0 | 0 | 1 | 0 |
| 1527 | chr34:27510736-27525882 | 0 | 0 | 0 | 1 | 0 |
| 1528 | chr34:27749024-27769662 | 0 | 0 | 0 | 1 | 0 |
| 1529 | chr34:28208358-28227656 | 0 | 1 | 0 | 1 | 0 |
| 1530 | chr34:30581558-30599847 | 1 | 0 | 0 | 0 | 0 |
| 1531 | chr34:30918847-34823181 | 1 | 1 | 0 | 1 | 0 |
| 1532 | chr34:36913688-36931951 | 0 | 0 | 0 | 1 | 0 |
| 1533 | chr34:40315406-40331930 | 0 | 0 | 0 | 1 | 0 |
| 1534 | chr34:42080451-42100934 | 0 | 0 | 0 | 1 | 0 |
| 1535 | chr34:44447229-44463597 | 0 | 0 | 0 | 1 | 0 |
| 1536 | chr34:45086698-45114344 | 1 | 1 | 0 | 1 | 0 |
| 1537 | chr35:3055747-3069947   | 0 | 0 | 0 | 1 | 0 |
| 1538 | chr35:5098546-5116948   | 0 | 0 | 0 | 1 | 0 |
| 1539 | chr35:6743927-6763362   | 0 | 0 | 0 | 1 | 0 |
| 1540 | chr35:8148462-8168782   | 0 | 0 | 0 | 1 | 0 |
| 1541 | chr35:10248558-10266925 | 0 | 0 | 0 | 1 | 0 |
| 1542 | chr35:15939315-15972584 | 0 | 1 | 0 | 1 | 0 |
| 1543 | chr35:16535000-16589000 | 1 | 0 | 0 | 0 | 1 |
| 1544 | chr35:17102329-17119547 | 0 | 0 | 0 | 1 | 0 |
| 1545 | chr35:18062335-18077468 | 0 | 0 | 0 | 1 | 0 |
| 1546 | chr35:19456853-19475324 | 0 | 0 | 0 | 1 | 0 |
| 1547 | chr35:20064567-20081884 | 0 | 0 | 0 | 1 | 0 |
| 1548 | chr35:20306001-20325697 | 0 | 0 | 0 | 1 | 0 |
| 1549 | chr35:27024981-27040092 | 0 | 0 | 0 | 1 | 0 |
| 1550 | chr35:28021255-28054675 | 0 | 1 | 0 | 1 | 0 |
| 1551 | chr35:28590087-28605460 | 0 | 0 | 0 | 1 | 0 |
| 1552 | chr35:28863169-28880476 | 0 | 0 | 0 | 1 | 0 |
| 1553 | chr35:28932740-28946953 | 0 | 0 | 0 | 1 | 0 |
| 1554 | chr35:29123993-29151020 | 0 | 1 | 0 | 1 | 0 |
| 1555 | chr36:3731712-3746936   | 0 | 0 | 0 | 1 | 0 |
| 1556 | chr36:5742125-5757474   | 0 | 0 | 0 | 1 | 0 |
| 1557 | chr36:7018416-7077514   | 0 | 0 | 1 | 0 | 0 |

|      |                         |   |   |   |   |   |
|------|-------------------------|---|---|---|---|---|
| 1558 | chr36:9155318-9178400   | 0 | 0 | 0 | 1 | 0 |
| 1559 | chr36:9720373-9770373   | 0 | 0 | 0 | 0 | 1 |
| 1560 | chr36:9988852-10012751  | 0 | 0 | 0 | 1 | 0 |
| 1561 | chr36:13618048-13634387 | 0 | 0 | 0 | 1 | 0 |
| 1562 | chr36:16752848-16767990 | 0 | 0 | 0 | 1 | 0 |
| 1563 | chr36:16858375-16875844 | 0 | 0 | 0 | 1 | 0 |
| 1564 | chr36:19512750-19529945 | 0 | 0 | 0 | 1 | 0 |
| 1565 | chr36:20860433-20878965 | 0 | 0 | 0 | 1 | 0 |
| 1566 | chr36:20976246-20990511 | 0 | 0 | 0 | 1 | 0 |
| 1567 | chr36:24719443-24737764 | 0 | 0 | 0 | 1 | 0 |
| 1568 | chr36:25960843-25979288 | 0 | 0 | 0 | 1 | 0 |
| 1569 | chr36:27881362-27899782 | 0 | 0 | 0 | 1 | 0 |
| 1570 | chr36:28746402-28761528 | 0 | 0 | 0 | 1 | 0 |
| 1571 | chr36:29850403-29864656 | 0 | 0 | 0 | 1 | 0 |
| 1572 | chr36:30605563-30638838 | 0 | 1 | 0 | 1 | 0 |
| 1573 | chr36:30682413-30698771 | 0 | 0 | 0 | 1 | 0 |
| 1574 | chr36:32194138-32208187 | 0 | 0 | 0 | 1 | 0 |
| 1575 | chr36:32384758-32400038 | 0 | 0 | 0 | 1 | 0 |
| 1576 | chr36:32533089-32557790 | 0 | 0 | 0 | 1 | 0 |
| 1577 | chr36:33079135-33096654 | 0 | 0 | 0 | 1 | 0 |
| 1578 | chr36:33192752-33208066 | 0 | 0 | 0 | 1 | 0 |
| 1579 | chr37:3635260-3671648   | 1 | 0 | 0 | 0 | 0 |
| 1580 | chr37:4501758-4520288   | 0 | 0 | 0 | 1 | 0 |
| 1581 | chr37:4914110-4931304   | 0 | 0 | 0 | 1 | 0 |
| 1582 | chr37:5387902-5405319   | 0 | 0 | 0 | 1 | 0 |
| 1583 | chr37:6348122-6369309   | 0 | 1 | 0 | 1 | 0 |
| 1584 | chr37:16080016-16098498 | 0 | 1 | 0 | 1 | 0 |
| 1585 | chr37:17267936-17283001 | 0 | 0 | 0 | 1 | 0 |
| 1586 | chr37:20405518-20505518 | 0 | 0 | 0 | 0 | 1 |
| 1587 | chr37:24085594-24102882 | 0 | 0 | 0 | 1 | 0 |
| 1588 | chr37:25505141-25530669 | 0 | 0 | 0 | 1 | 0 |
| 1589 | chr37:26602026-26619377 | 0 | 0 | 0 | 1 | 0 |
| 1590 | chr37:26671085-26690637 | 0 | 0 | 0 | 1 | 0 |
| 1591 | chr37:27584574-27603180 | 0 | 0 | 0 | 1 | 0 |
| 1592 | chr37:28375929-28390246 | 0 | 0 | 0 | 1 | 0 |
| 1593 | chr37:29900749-29920152 | 0 | 1 | 0 | 1 | 0 |
| 1594 | chr37:31763349-31780580 | 0 | 0 | 0 | 1 | 0 |
| 1595 | chr37:33507508-33527175 | 0 | 0 | 0 | 1 | 0 |
| 1596 | chr38:6165434-6179515   | 0 | 0 | 0 | 1 | 0 |
| 1597 | chr38:6913162-7039264   | 0 | 1 | 0 | 1 | 0 |
| 1598 | chr38:7884810-7906430   | 0 | 0 | 0 | 1 | 0 |
| 1599 | chr38:10369367-10384564 | 0 | 0 | 0 | 1 | 0 |
| 1600 | chr38:10437075-10506909 | 0 | 0 | 1 | 1 | 0 |
| 1601 | chr38:11092939-11119604 | 0 | 1 | 0 | 1 | 0 |
| 1602 | chr38:15428754-15448312 | 0 | 0 | 0 | 1 | 0 |
| 1603 | chr38:16889950-16904151 | 0 | 1 | 0 | 1 | 0 |
| 1604 | chr38:18603938-18619161 | 0 | 0 | 0 | 1 | 0 |
| 1605 | chr38:20329934-20349374 | 0 | 0 | 0 | 1 | 0 |
| 1606 | chr38:23534329-23552778 | 0 | 0 | 0 | 1 | 0 |
| 1607 | chr38:24083547-24121103 | 1 | 0 | 0 | 1 | 0 |
| 1608 | chr38:26203894-26263149 | 1 | 1 | 1 | 1 | 0 |
| 1609 | chr38:26324251-26349029 | 0 | 0 | 0 | 1 | 0 |

|      |                         |   |   |   |   |   |
|------|-------------------------|---|---|---|---|---|
| 1610 | chr38:26356402-26376070 | 0 | 0 | 0 | 1 | 0 |
| 1611 | chr38:26560200-26576890 | 0 | 1 | 0 | 1 | 0 |

\* refers to CNVs identified using the 2.1 million probe aCGH experiment of Nicholas et al. 2011, but that they did not choose to report because were low confidence CNV.



**Table S3. List of primers and probes used in the qPCR validation**

| <b>Gene</b>        | <b><i>PDE4D</i></b>                 | <b><i>CRTC3</i></b>             | <b><i>SLC6A11</i></b>                   |
|--------------------|-------------------------------------|---------------------------------|-----------------------------------------|
| <b>Primer F</b>    | TTCTGGAGGGAAGCATTTTCA               | CCGTCTGGAAGACATTGTGTGT          | CCTGGCAGACAGCAGGTGTA                    |
| <b>Primer Rev</b>  | GTATTGATAACTGGGATGTGACATGTT         | GATGACTGAGGCAAGAGAGGAAA         | GGTTGGAGATAGTGCCATTGTTT                 |
| <b>TaqManProbe</b> | 6FAM –CATCTGGATGAGTCGAAG-<br>MGBNFQ | 6FAM –TGCGGGCTACCTGC-<br>MGBNFQ | 6FAM –<br>CTTCAGTAGCCAGGTGAG-<br>MGBNFQ |

**Figure S1.** Histogram of the number of genes in 1,000 simulated sets of regions with the same number and size of regions as the dog-specific CNV regions. In red the number of genes in the dog-specific CNV regions ( $P$ -value= 0.844).

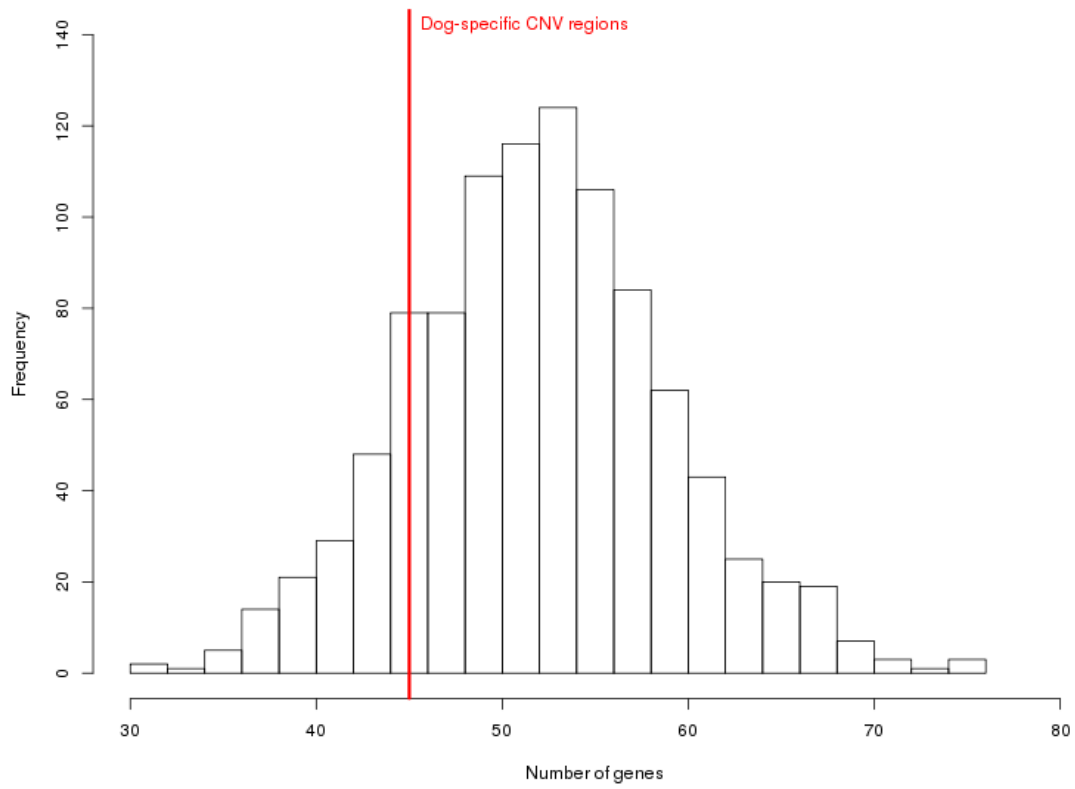

**Figure S2.** Histogram of the number of genes in 1,000 simulated sets of regions with the same number and size of regions as the CNV regions with only gains in wolves. In red, the number of genes in the CNV regions with only gains in wolves ( $P < 0.001$ ).

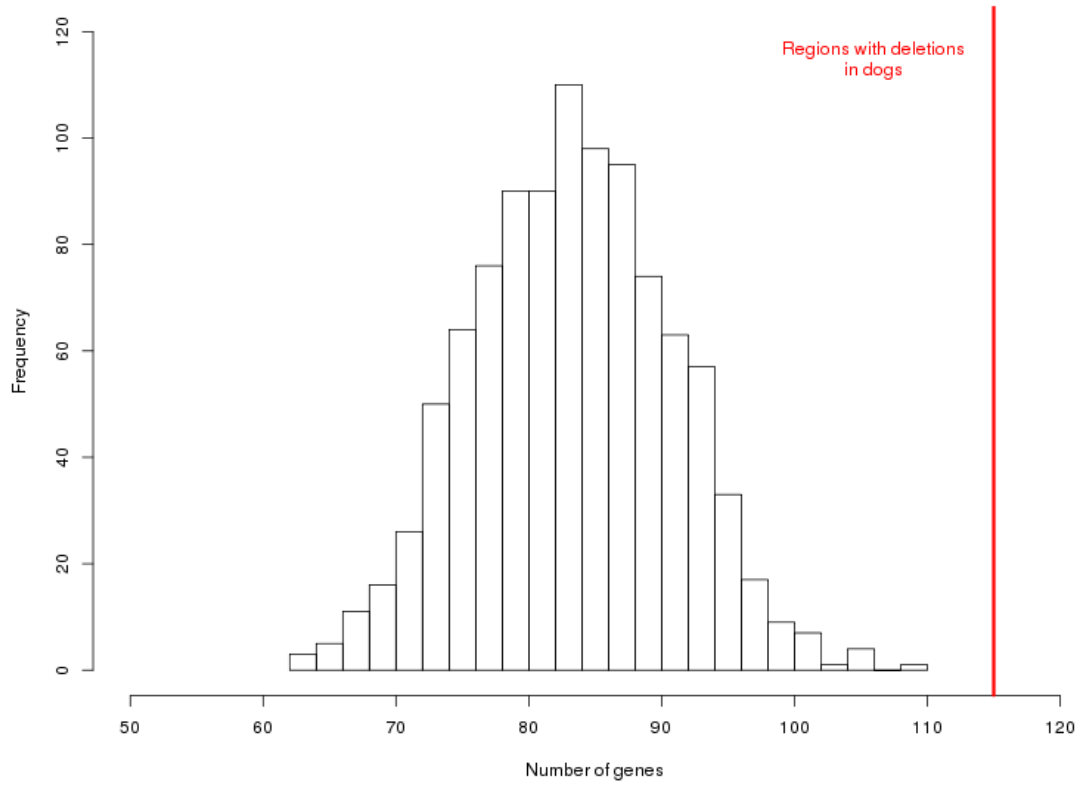

**Figure S3. Enrichment analysis of GC-peaks in CNV breakpoints.**

Observed to expected ratio of GC-peaks in breakpoints and in 400 bp steps away from the breakpoints.

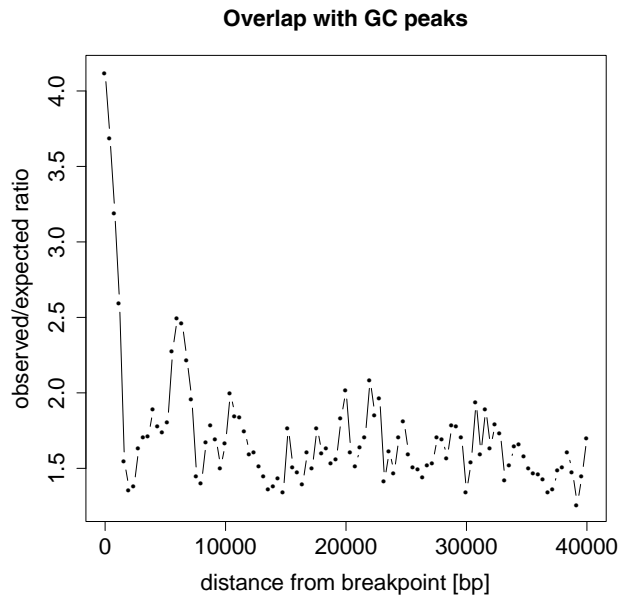

Supplement: 12864_2014_6138_MOESM1_ESM.pdf [file 12864_2014_6138_MOESM1_ESM.pdf]
